# Supplementary material for: Monitoring Mycotoxin Exposure in Food-Producing Animals (Cattle, Pig, Poultry, and Sheep)
Source: MDPI journal article supplement (doi:10.3390/toxins16050218), 2024-05-09
Supplement: s1 [file s1]

---

# **Supplementary Materials: Monitoring Mycotoxin Exposure in Food-Producing Animals (Cattle, Pig, Poultry, and Sheep)**

**Borja Muñoz-Solano, Elena Lizarraga Pérez and Elena González-Peñas \***

Department of Pharmaceutical Sciences, Faculty of Pharmacy and Nutrition, Universidad de Navarra,  
31008 Pamplona, Spain; bmunoz.1@alumni.unav.es (B.M.-S.); elizarraga@unav.es (E.L.P.)

\* Correspondence: mgpenas@unav.es

**Table S1.** Analytical methods employed for mycotoxin analysis in feed.

| Matrix                           | Analyte/s                                                                                           | LOQ<br>(µg/kg) | Sample preparation                                                                                                                                                                         | Separation and detection technique                                                                                                                                                                                                                    | year | Ref |
|----------------------------------|-----------------------------------------------------------------------------------------------------|----------------|--------------------------------------------------------------------------------------------------------------------------------------------------------------------------------------------|-------------------------------------------------------------------------------------------------------------------------------------------------------------------------------------------------------------------------------------------------------|------|-----|
| Pig feed                         | Total AFs, ZEA, Total FBs                                                                           | 1-250          | SLE<br>20 g + 100 mL of 70% MeOH (mix 25 °C, 3 min). Whatman No. 1 filtration.<br>AFs: measured directly.<br>ZEA: dilute 1:4 with 70% MeOH<br>FBs: dilute 1:19 with H <sub>2</sub> O       | ELISA<br>AgraQuant Total Aflatoxin Assay 1/20<br>AgraQuant Total Fumonisin Assay 0.25/5.0<br>AgraQuant Zearalenone Plus Assay 25/1000                                                                                                                 | 2019 | [1] |
| Pig feed                         | DON                                                                                                 | 25             | SLE<br>20 g + 100 mL of H <sub>2</sub> O (mix 25 °C, 3 min). Whatman No. 1 filtration.<br>Dilute 1:4 with H <sub>2</sub> O                                                                 | ELISA<br>AgraQuant Deoxynivalenol Assay 0.25/5.0                                                                                                                                                                                                      | 2019 | [1] |
| Cattle, poultry, and animal feed | AFs, FBs                                                                                            | n.i*           | SLE<br>20 g + 40 mL of 90% MeOH (mix 2 min). Whatman No. 1 filtration. pH adjusted to 7.0 (25%NaOH or 2M HCl).<br>FBs: measured directly.<br>AFs: dilute 1 mL with 1.5 mL 57% MeOH         | ELISA<br>Helica Biosystems                                                                                                                                                                                                                            | 2019 | [2] |
| Poultry and cattle feed          | AFB1, AFB2, AFG1, AFG2, OTA, FB1, FB2, ZEA, DON                                                     | 0.6-18         | SLE<br>1 g + 4 mL ACN/ H <sub>2</sub> O/Acetic acid (80:20:1) + vortex 1 min + orbital shaker 60 min + centrifugation 1500 g 5 min + filtration 0.22 µm PTFE.<br>80 µL filtrate + 20 µL IS | LC-MS/MS<br>Column: Raptor™ ARC-18 (2.1 × 100 mm, 2.7 µm) at 40°C<br>Flow: 0.2 mL/min<br>Mobile phase: (A) 0.1% formic acid in H <sub>2</sub> O; (B) 0.1% formic acid in ACN: MeOH (50:50, v/v) in gradient conditions<br>Detector: QqQ, ESI (±), MRM | 2019 | [3] |
| Poultry feed                     | ZEA, α-ZEL, β-ZEL, T-2, FB1, FB2, FB3, AFB1, AFB2, AFG1, AFG2, HT-2, AME, DON, 3-ADON, 15-ADON, OTA | 0.1-63.9       | SLE<br>10 g + 40 mL ACN/ H <sub>2</sub> O /formic acid (79/20/1) + mix 60 min 180 rpm horizontal shaker + centrifugation + filtration 0.22 µm PTFE                                         | LC-MS/MS<br>Column: BEH C18 (2.1 × 50 mm, 1.7 µm) at 40°C<br>Flow: 0.6 mL/min<br>Mobile phase: (A) H <sub>2</sub> O; (B) ACN, both containing 0.1% of acetic acid and ammonium acetate at 5 mM in gradient conditions<br>Detector: QqQ, ESI (+), MRM  | 2019 | [4] |

**Table S1.** Analytical methods employed for mycotoxin analysis in feed (continuation)

| Matrix                         | Analyte/s                                                                                                                        | LOQ<br>(µg/kg) | Sample preparation                                                                                                                                                                                                                                                                                                                                                                                | Separation and detection technique                                                                                                                                                                                                                                   | year | Ref |
|--------------------------------|----------------------------------------------------------------------------------------------------------------------------------|----------------|---------------------------------------------------------------------------------------------------------------------------------------------------------------------------------------------------------------------------------------------------------------------------------------------------------------------------------------------------------------------------------------------------|----------------------------------------------------------------------------------------------------------------------------------------------------------------------------------------------------------------------------------------------------------------------|------|-----|
| Poultry, cattle and sheep feed | AFB1, AFB2, AFG1, AFG2, AME, AOH, TENT, OTA, BEA, ENNA, ENNA1, ENNB, ENNB1, DON, 15-ADON, 3-ADON, NIV, NEO, DAS, T-2, HT-2, ZEA. | 0.3-225.5      | QuEChERS<br>2-5 g + 10 mL ACN/ H <sub>2</sub> O formic acid (79/20/1) + mix 5 min horizontal shaker + centrifugation at 4000 rpm 5 min 5°C + QuEChERS (4 g of MgSO <sub>4</sub> and 1 g of NaCl) + 1 min shake + centrifugation 4000 rpm 10 min.<br>2 mL supernatant + 100 mg C18 (or PSA) + 600 mg MgSO <sub>4</sub> + 1 min shake + centrifugation at 4000 rpm 10 min + filtration 0.22 µm PTFE | LC-MS/MS<br>Column: Gemini C18 (2 × 150 mm, 2 µm) at 25°C<br>Flow: 0.25 mL/min<br>Mobile phase: (A) MeOH; (B) H <sub>2</sub> O, both containing 0.1% formic acid and 5 mM ammonium formate. Gradient conditions<br>Detector: QTRAP, ESI (+), MRM                     | 2019 | [5] |
| Cattle feed                    | AFB1, AFB2, AFG1, AFG2, OTA, ZEA                                                                                                 | 0.06-2.8       | IAC<br>25 g + 5 g NaCl + ACN/ H <sub>2</sub> O (80/20) + mix 2 min at high speed + filtration.<br>10 mL extract + 40 mL PBS (pH 7.4) 0.01% tween 20 + vortex + filtration.<br>20 mL of extract through a multiple-mycotoxin immunoaffinity column (AOZ IAC)                                                                                                                                       | LC-FLD<br>Column: ACE C18 (250 × 4.6 mm, 5 µm) at 40°C<br>Post column derivatization: UV light 254 nm<br>Flow: 0.8 mL/min<br>Mobile phase: MeOH/ H <sub>2</sub> O/ACN (22/62/16)<br>Detector: 360/460 nm (lex/lem)                                                   | 2019 | [6] |
| Pig feed                       | AFB1, AFB2, AFG1, AFG2                                                                                                           | 1              | SLE<br>2 g + 10 mL ACN + 3 min vortex + 5 min centrifugation at 4500 rpm.<br>2 mL supernatant evaporated to dryness under N <sub>2</sub> + reconstituted with 1 mL MeOH/ H <sub>2</sub> O (50/50)                                                                                                                                                                                                 | LC-FLD<br>Column: C18 Kinetex separation (150 × 4.6 mm, 2.6 µm) at 30°C<br>Flow: 0.8 mL/min<br>Mobile phase: (A) H <sub>2</sub> O, (B) MeOH, (C) ACN, in gradient conditions<br>Detector: 365/460 nm (lex/lem)                                                       | 2019 | [7] |
| Pig feed                       | FB1, FB2, ZEA, OTA, CIT, T-2, HT-2, DON, FUS-X, STER, ENNA, ENNA1, ENNB, ENNB1, BEA                                              | 2.0-136        | QuEChERS<br>2 g + 8 mL H <sub>2</sub> O + 1 min vortex + 10 mL ACN/formic acid (95/5) + 3 min vortex + 4 g MgSO <sub>4</sub> + 1g NaCl + 2 min shake + 5 min centrifugation 4500 rpm.<br>2 mL supernatant evaporated to dryness under N <sub>2</sub> + reconstituted with 1 mL MeOH/ H <sub>2</sub> O (50/50)                                                                                     | LC-MS/MS<br>Column: C18 Zorbax Eclipse Plus RRHD (50 × 2.1 mm, 1.8 µm) at 35°C<br>Flow: 0.4 mL/min<br>Mobile phase: (A) H <sub>2</sub> O; (B) MeOH, both containing 0.3% formic acid and 5mM ammonium formate, in gradient conditions<br>Detector: QqQ, ESI (+), MRM | 2019 | [7] |

**Table S1.** Analytical methods employed for mycotoxin analysis in feed (continuation)

| Matrix       | Analyte/s                                                                                                                                                                         | LOQ<br>(µg/kg) | Sample preparation                                                                                                                                                                                                                                                                                                                                                                                                       | Separation and detection technique                                                                                                                                                                                                                                                                     | year | Ref  |
|--------------|-----------------------------------------------------------------------------------------------------------------------------------------------------------------------------------|----------------|--------------------------------------------------------------------------------------------------------------------------------------------------------------------------------------------------------------------------------------------------------------------------------------------------------------------------------------------------------------------------------------------------------------------------|--------------------------------------------------------------------------------------------------------------------------------------------------------------------------------------------------------------------------------------------------------------------------------------------------------|------|------|
| Poultry feed | AFB1, AFB2, AFG1, AFG2, AFM1, AOH, AOH methyl ether, BEA, CIT, Cyclopiazonic acid, DON, FB1, FB2, FB3, FB4, Hydrolyzed FB1, MON, NIV, OTA, OTB, Tenuazonic acid, ZEA, ZEA-sulfate | n.i.           | SLE<br>5 g + 20 mL ACN/ H <sub>2</sub> O /formic acid (79/20/1) + 90 min rotatory shaker + 20 mL ACN/ H <sub>2</sub> O /formic acid (20/79/1)                                                                                                                                                                                                                                                                            | LC-MS/MS<br>Column: Gemini C18 (4.6 × 150 mm, 5 µm) at 25°C<br>Flow: 0.25 mL/min<br>Mobile phase: (A) MeOH / H <sub>2</sub> O /acetic acid (10:89:1); (B) MeOH / H <sub>2</sub> O /acetic acid (97:2:1) both containing 5 mM ammonium acetate. in gradient conditions<br>Detector: QTRAP, ESI (±), MRM | 2019 | [8]  |
| Animal Feed  | AFB1                                                                                                                                                                              | n.i.           | SPE<br>5 g + 20 mL ACN/ H <sub>2</sub> O (90/10) + vortex 10 min + centrifuge 1895g 5 min + filtration + 6 mL extract passed through SPE + 4 mL extract evaporated N <sub>2</sub> + reconstituted 400 µL H <sub>2</sub> O /TFA/acetic acid (35/10/5) + vortex 10 s + heat 65°C 15 min + 20 h at room temperature                                                                                                         | LC-FLD<br>Column: not indicated<br>Flow: 1.0 mL/min<br>Mobile phase: (A) H <sub>2</sub> O (B) ACN<br>Detector: FLD                                                                                                                                                                                     | 2019 | [9]  |
| Animal Feed  | AFB1                                                                                                                                                                              | n.i.           | SLE<br>5 g + 25 mL MeOH 70% + shake 5 min + filtration + 1 mL extract diluted with 1 mL H <sub>2</sub> O                                                                                                                                                                                                                                                                                                                 | ELISA<br>Aflatoxin kit r-biopharm®                                                                                                                                                                                                                                                                     | 2019 | [9]  |
| Cattle feed  | AFB1                                                                                                                                                                              | 0.007-0.3      | SLE<br>0.5 g + 10 mL MeOH 80% + vortex 20 min + centrifuge 3.5xg 5 min + supernatant + 6 mL n-hexane + vortex 30s + centrifuge 3.5xg 5 min + bottom layer dried at 45°C + reconstitute with 10 mL MeOH/ H <sub>2</sub> O (1/9) + 100 µL 1-octanol + 100 µL toluene + vortex 45s + 15% (w/v) Na <sub>2</sub> SO <sub>4</sub> . Collect upper organic phase + dried 20 µL of organic phase + reconstituted in 20 µL buffer | Capillary Electrophoresis-Laser Induced Fluorescence<br>Column: uncoated fused-silica capillary (44 cm x 50 µm)                                                                                                                                                                                        | 2019 | [10] |

**Table S1.** Analytical methods employed for mycotoxin analysis in feed (continuation)

| Matrix      | Analyte/s                                | LOQ<br>(µg/kg) | Sample preparation                                                                                                                                                                                                                                                                                                      | Separation and detection technique                                                                                                                                                                                                                                                                                                                   | year | Ref  |
|-------------|------------------------------------------|----------------|-------------------------------------------------------------------------------------------------------------------------------------------------------------------------------------------------------------------------------------------------------------------------------------------------------------------------|------------------------------------------------------------------------------------------------------------------------------------------------------------------------------------------------------------------------------------------------------------------------------------------------------------------------------------------------------|------|------|
| Animal Feed | AFB1, DON, FB1, FB2, OTA, T-2, HT-2, ZEA | 0.71-12.6      | SLE<br>1 g + 4 mL ACN/ H <sub>2</sub> O / formic acid (79/20/1) + shake 30 min + centrifuge 3500 rpm 15 min + 0.1 mL extract evaporated N <sub>2</sub> 40°C + reconstituted in 0.05 mL of MeOH /0.01 M ammonium acetate (5:95, v/v) and 0.05 mL MeOH /0.01 M ammonium acetate (95:5, v/v) + centrifuge 14800 rpm 30 min | LC-MS/MS<br>Column: Kinetex Biphenyl (100 × 2.1 mm, 2.6 µm) at 40°C<br>Flow: 0.3 mL/min<br>Mobile phase: (A) 0.01 M ammonium acetate and 0.1% of acetic acid in H <sub>2</sub> O /MeOH (95:5, v/v); (B) 0.01 M ammonium acetate and 0.1% of acetic acid in H <sub>2</sub> O /MeOH (5:95, v/v), in gradient conditions<br>Detector: QqQ, ESI (±), MRM | 2019 | [11] |
| Animal Feed | AFB1, DON, FB1, FB2, OTA, T-2, HT-2, ZEA | 0.38-8.41      | IAC<br>1 g + 4 mL ACN/ H <sub>2</sub> O / formic acid (79/20/1) + shake 30 min + centrifuge 3500 rpm 15 min + 0.5 mL extract + 6 mL PBS + centrifuge 3500 rpm 10 min + 2 mL diluted extract passed through IAC + elution with 1.5 mL MeOH + dried N <sub>2</sub> 40°C + reconstitute in mobile phase                    | LC-MS/MS<br>Column: Kinetex Biphenyl (100 × 2.1 mm, 2.6 µm) at 40°C<br>Flow: 0.3 mL/min<br>Mobile phase: (A) 0.01 M ammonium acetate and 0.1% of acetic acid in H <sub>2</sub> O /MeOH (95:5, v/v); (B) 0.01 M ammonium acetate and 0.1% acetic acid in H <sub>2</sub> O /MeOH (5:95, v/v), in gradient conditions<br>Detector: QqQ, ESI (±), MRM    | 2019 | [11] |
| Cattle feed | AFs                                      | 0.05           | SLE<br>2 g + 5 mL of 70% MeOH + vortex 5 min + centrifuge at 10000 g 10 min at room temperature. 0.5 mL + 0.5 mL H <sub>2</sub> O                                                                                                                                                                                       | ELISA                                                                                                                                                                                                                                                                                                                                                | 2020 | [12] |
| Cattle feed | T-2                                      | 0.05           | SLE<br>1 g + 20 mL of 90% MeOH + vortex 5 min + centrifuge at 10000 g 5 min at room temperature. 1 mL + 5 mL H <sub>2</sub> O                                                                                                                                                                                           | ELISA                                                                                                                                                                                                                                                                                                                                                | 2020 | [12] |

**Table S1.** Analytical methods employed for mycotoxin analysis in feed (continuation)

| Matrix                       | Analyte/s                                                                                                             | LOQ<br>(µg/kg) | Sample preparation                                                                                                                                                                                                                                                                                                                    | Separation and detection technique                                                                                                                                                                                                                                                                                                                         | year | Ref  |
|------------------------------|-----------------------------------------------------------------------------------------------------------------------|----------------|---------------------------------------------------------------------------------------------------------------------------------------------------------------------------------------------------------------------------------------------------------------------------------------------------------------------------------------|------------------------------------------------------------------------------------------------------------------------------------------------------------------------------------------------------------------------------------------------------------------------------------------------------------------------------------------------------------|------|------|
| Cattle feed                  | DON                                                                                                                   | 10             | SLE<br>2 g + 20 mL of 90% MeOH + vortex 5 min + centrifuge at 10000 g 10 min at room temperature.<br>0.5 mL + 0.5 mL H <sub>2</sub> O                                                                                                                                                                                                 | ELISA                                                                                                                                                                                                                                                                                                                                                      | 2020 | [12] |
| Cattle feed                  | ZEA                                                                                                                   | 0.3            | SLE<br>2 g + 8 mL of 90% MeOH + vortex 5 min + centrifuge at 10000g 10 min at room temperature.<br>0.5 mL + 2 mL H <sub>2</sub> O                                                                                                                                                                                                     | ELISA                                                                                                                                                                                                                                                                                                                                                      | 2020 | [12] |
| Cattle feed                  | FB                                                                                                                    | 0.5            | SLE<br>1 g + 5 mL of 70% MeOH + vortex 5 min + centrifuge at 10000 g 10 min at room temperature.<br>0.1 mL + 1.9 mL H <sub>2</sub> O                                                                                                                                                                                                  | ELISA                                                                                                                                                                                                                                                                                                                                                      | 2020 | [12] |
| Pig, poultry and cattle feed | AFB1, AFB2, AFG1, AFG2, T-2, HT-2, OTA, FB1, FB2, DAS, 15-ADON, NEO, FUS-X, ZEA, DON, NIV, 3-ADON                     | 1-40           | QuEChERS<br>1 g + 10 mL H <sub>2</sub> O /formic acid (99/1) + shake 30 min + 10 mL ACN + shake 30 min + 4 g MgSO <sub>4</sub> + 1 g NaCl + shake 30 s + centrifuge 5 min at 10000 rpm<br>2 mL + 300 mg MgSO <sub>4</sub> + 100 mg C18 + mix and centrifuge + evaporation to dryness + reconstitute with 960 µL 20% MeOH and 40 µL IS | LC-MS/MS<br>Column: Accucore analytical (100 × 2.1 mm × 2.6 µm) at 25°C<br>Flow: 0.4 mL/min<br>Mobile phase: (A) MeOH, (B) H <sub>2</sub> O, both containing 5 mM ammonium formate and 0.1% formic acid; (C) H <sub>2</sub> O, (D) MeOH, both containing 5 mM ammonium acetate and 0.1% acetic acid, in gradient conditions<br>Detector: QqQ, ESI (±), MRM | 2020 | [13] |
| Cattle and poultry feed      | AFB1, AFB2, AFG1, AFG2, AFM1, AFs, DON, DON-3gluc, NIV, FA1, FA2, FB1, FB2, FB3, FB4, FBs, OTA, ERGOT, HT-2, T-2, ZEA | n.i.           | SLE<br>5 g + 20 mL ACN/ H <sub>2</sub> O /formic acid (79/20/1) + 90 min rotatory shaker.<br>1 mL + 1 mL ACN/ H <sub>2</sub> O /formic acid (20/79/1)                                                                                                                                                                                 | LC-MS/MS<br>Column: Gemini C18 (4.6 × 150 mm, 5 µm) at 25°C<br>Flow: 0.25 mL/min<br>Mobile phase: (A) MeOH / H <sub>2</sub> O /acetic acid (10:89:1); (B) MeOH / H <sub>2</sub> O /acetic acid (97:2:1), both containing 5 mM ammonium acetate, in gradient conditions<br>Detector: QTRAP, ESI (±), MRM                                                    | 2020 | [14] |

**Table S1.** Analytical methods employed for mycotoxin analysis in feed (continuation)

| Matrix                 | Analyte/s                             | LOQ<br>(µg/kg) | Sample preparation                                                                                                                                                                                                                                                                                                                                                       | Separation and detection technique                                                                                                                                                                                                                                                                                                                                                                                                 | year | Ref  |
|------------------------|---------------------------------------|----------------|--------------------------------------------------------------------------------------------------------------------------------------------------------------------------------------------------------------------------------------------------------------------------------------------------------------------------------------------------------------------------|------------------------------------------------------------------------------------------------------------------------------------------------------------------------------------------------------------------------------------------------------------------------------------------------------------------------------------------------------------------------------------------------------------------------------------|------|------|
| Cattle and animal Feed | AFB1, AFB2, AFG1, AFG2                | 0.05-1         | IAC<br>5 g + 40 mL ACN/ H <sub>2</sub> O (90:10) + ultrasonic bath 10 min + centrifuge 10 min 4676 g.<br>3 mL + 72 mL PBS + filter through an IAC column (Easi-extract® Aflatoxin)                                                                                                                                                                                       | LC-FLD<br>Column: Poroshell 120 EC-C18 UHPLC (4.6 × 50 mm, 2.7 µm) at 40°C<br>Post column derivatization: UV light 254 nm<br>Flow: 1.2 mL/min<br>Mobile phase: MeOH/ H <sub>2</sub> O / ACN (20/70/10)<br>Detector: 365/440 nm (λ <sub>ex</sub> /λ <sub>em</sub> )                                                                                                                                                                 | 2020 | [15] |
| Animal feed            | AFB1, AFB2, AFG1, AFG2                | 0.5            | IAC<br>12.5 g + 12.5 mL H <sub>2</sub> O + mix + 100 mL (MeOH/ H <sub>2</sub> O 8:2) + 5 g NaCl + shake 30 min + centrifuge 2800 g 5 min<br>3 mL + 12 mL H <sub>2</sub> O + 0.1 mL tween 20 + pass through Aflatest® IAC column<br>1 mL evaporated and reconstituted in 0.5 mL MeOH/H <sub>2</sub> O 1:1 0.5 % acetic acid.                                              | LC-FLD<br>Column: UPLC BEH amide C18 (2.1x 100 mm x 1.7 µm) at 40°C<br>Flow: 0.4 mL/min<br>Mobile phase: (A) H <sub>2</sub> O 0.1% acetic acid (B) MeOH (C) ACN (64:18:18)<br>Detector: 365/456nm (λ <sub>ex</sub> /λ <sub>em</sub> )                                                                                                                                                                                              | 2020 | [16] |
| Animal feed            | AFB1, AFB2, AFG1, AFG2, OTA, OTB, ZEA | 0,63-42        | SPE<br>0.5 g + 5 mL ACN/ H <sub>2</sub> O /orthophosphoric acid (79/20/1) + vortex 1h + centrifuge 5500 rpm 10 min.<br>2 mL through Oasis Prime HLB SPE. 0.5 mL eluate + 0.5 mL chloroform + vortex 10 s + injection of 5 mL H <sub>2</sub> O + vortex 30 s + centrifugation 7000 rpm 5 min.<br>0.2 mL organic phase evaporated and reconstituted in 0.2 mL mobile phase | LC-FLD<br>Column: Cortecs T3 C18 (150 × 4.6 mm, 2.7 µm) at 40°C.<br>Post column derivatization: UV light 254 nm<br>Flow: 1.4 mL/min<br>Mobile phase: (A) H <sub>2</sub> O 0.1% ortophosphoric acid (B) ACN (C) MeOH, in gradient conditions.<br>Detector: 365/440 nm (λ <sub>ex</sub> /λ <sub>em</sub> ) for AFs, 234/469 nm (λ <sub>ex</sub> /λ <sub>em</sub> ) for Ochratoxins and ZEA                                           | 2020 | [17] |
| Animal feed            | AFB1, ZEA, T-2                        | 0.2-20         | IAC<br>Sample + MeOH/ H <sub>2</sub> O (75:25) for AFs and ZEA, (60:40) for T-2 + shaker 60 min at 23°C + centrifuge 10 min 3468 g<br>Filter + PBS + through 11+Myco MS-PREP® IAC column                                                                                                                                                                                 | LC-FLD<br>Column: LiChrospher 100 RP-18, LiChroCART 250- 4 (250 × 4.0 mm, 5 µm); at 30°C<br>Flow: 1 mL/min<br>Mobile phase: AFs: MeOH/ H <sub>2</sub> O / ACN (30/60/20). T-2: H <sub>2</sub> O / ACN (40/60). ZEA: MeOH/ H <sub>2</sub> O / ACN (46/46/8)<br>Detector: AFs 365/435 nm (λ <sub>ex</sub> /λ <sub>em</sub> ). T-2 381/470 nm (λ <sub>ex</sub> /λ <sub>em</sub> ). ZEA 274/418 nm(λ <sub>ex</sub> /λ <sub>em</sub> ). | 2021 | [18] |

**Table S1.** Analytical methods employed for mycotoxin analysis in feed (continuation)

| Matrix       | Analyte/s                                         | LOQ<br>(µg/kg) | Sample preparation                                                                                                                                                                                            | Separation and detection technique                                                                                                                                                                                                                                                                                   | year | Ref  |
|--------------|---------------------------------------------------|----------------|---------------------------------------------------------------------------------------------------------------------------------------------------------------------------------------------------------------|----------------------------------------------------------------------------------------------------------------------------------------------------------------------------------------------------------------------------------------------------------------------------------------------------------------------|------|------|
| Animal feed  | DON                                               | 1.4            | IAC<br>Sample + H <sub>2</sub> O + shaker 60 min at 23°C + centrifuge 10 min<br>3468 g<br>Filter + PBS + through 11+Myco MS-PREP® IAC column                                                                  | LC-UV<br>Column: LiChrospher 100 RP-18, LiChroCART<br>250- 4 (250 × 4.0 mm, 5 µm), at 30°C<br>Flow: 1 mL/min<br>Mobile phase: MeOH/ H <sub>2</sub> O / ACN (3/94/3).<br>Detector: UV 218 nm                                                                                                                          | 2021 | [18] |
| Cattle feed  | AFB1, AFB2, AFG1, AFG2, AFs                       | 0.19-<br>2.75  | IAC<br>25 g + 5 g NaCl + 125 mL MeOH/ H <sub>2</sub> O (70:30) + 30 min<br>orbital shake + filter using whatman n° 1.<br>15 mL + 30 mL H <sub>2</sub> O. 15 mL pass through AflaPure™ IAC<br>column           | ELISA + LC-FLD<br>Column: Waters Spherisorb C- 18 (250 × 4.6 mm,<br>5 µm), at 40°C<br>Pre column derivatization: Hexane + TFA<br>Flow: 1 mL/min<br>Mobile phase: MeOH/ H <sub>2</sub> O / ACN (20/60/20)<br>Detector: 365/435 nm (λ <sub>ex</sub> /λ <sub>em</sub> )                                                 | 2021 | [19] |
| Animal feed  | AFB1, DON, DON-3-glucoside,<br>FB1, FB2, FB3, ZEA | 0.19-<br>5.77  | SLE<br>5 g + 20 mL ACN/ H <sub>2</sub> O / acetic acid (79:20:1) + 90 min<br>rotatory shaker.<br>500 µL + 500 µL ACN/ H <sub>2</sub> O /acetic acid (20:79:1)                                                 | LC-MS/MS<br>Column: Gemini C18 (4.6 × 150 mm, 5 µm), at<br>25°C<br>Flow: 0.25 mL/min<br>Mobile phase: (A) MeOH / H <sub>2</sub> O /acetic acid<br>(10:89:1); (B) MeOH / H <sub>2</sub> O /acetic acid (97:2:1),<br>both containing 5 mM ammonium acetate, in<br>gradient conditions<br>Detector: QTRAP, ESI (±), MRM | 2021 | [20] |
| Cattle feed  | AFB1                                              | 0.1            | IAC<br>25 g + 2.5 g NaCl + 50 mL MeOH 80% + mix 1 min + filter<br>through whatman n° 4.<br>10 mL + 40 mL H <sub>2</sub> O. 10 mL through AflaTest WB SR IAC<br>column                                         | LC-FLD<br>Column: Ace 5 C18, (250 × 4.6 mm, 5 µm)<br>Post column derivatization: UV light 254 nm<br>Flow: 1 mL/min<br>Mobile phase: MeOH/ H <sub>2</sub> O / ACN (40/50/10)<br>Detector: 365/435 nm (λ <sub>ex</sub> /λ <sub>em</sub> )                                                                              | 2021 | [21] |
| Poultry feed | AFB1, AFB2, AFG1, AFG2, AFs                       | 0.3-1.86       | IAC<br>50 g + 5 g NaCl + 100 mL MeOH/ H <sub>2</sub> O (80/20) + filter. 10 mL<br>+ 40 mL H <sub>2</sub> O. 15 mL pass through AflaTest WB SR IAC<br>column. Elution with 1 mL MeOH and 1 mL H <sub>2</sub> O | LC-FLD<br>Column: C18 (250 × 4.6 mm, 5 µm)<br>Post column derivatization: UV light 254 nm<br>H <sub>2</sub> O: 0.6 mL/min<br>Mobile phase: eOH/ ACN (55/35/10)<br>Detector: 365/435 nm (λ <sub>ex</sub> /λ <sub>em</sub> )                                                                                           | 2021 | [22] |



**Table S1.** Analytical methods employed for mycotoxin analysis in feed (continuation)

| Matrix                          | Analyte/s                                                                                                    | LOQ<br>(µg/kg) | Sample preparation                                                                                                                                                                                                                                                                          | Separation and detection technique                                                                                                                                                                                                                                                               | year | Ref  |
|---------------------------------|--------------------------------------------------------------------------------------------------------------|----------------|---------------------------------------------------------------------------------------------------------------------------------------------------------------------------------------------------------------------------------------------------------------------------------------------|--------------------------------------------------------------------------------------------------------------------------------------------------------------------------------------------------------------------------------------------------------------------------------------------------|------|------|
| Pig, poultry<br>and cattle feed | AFB1                                                                                                         | 0.5            | IAC<br>25 g + 100 mL MeOH/ H <sub>2</sub> O (80/20) + SPE clean up. Dilute with PBS + pass through AokinImmunoClean CF AFLA IAC column. Elution with MeOH. Evaporate to dryness using N <sub>2</sub> . Reconstitution in mobile phase.                                                      | LC-FLD<br>Column: Gemini C18 (250 × 4.6 mm, 5 µm), at 30°C<br>Flow: 1 mL/min<br>Mobile phase: MeOH/ H <sub>2</sub> O / ACN (30/60/10)<br>Detector: 360/435 nm (λ <sub>ex</sub> /λ <sub>em</sub> )                                                                                                | 2021 | [23] |
| Pig, poultry<br>and cattle feed | DON                                                                                                          | 100            | IAC<br>25 g + 100 mL MeOH/ H <sub>2</sub> O (60/40) + SPE clean up. Dilute with PBS + pass through AokinImmunoClean CF DON IAC column. Elution with MeOH. Evaporate to dryness using N <sub>2</sub> . Reconstitution in mobile phase.                                                       | LC-UV<br>Column: ZORBAX Eclipse XDB-C18 (150 × 4.6 mm, 5 µm), at 30°C<br>Flow: 0.8 mL/min<br>Mobile phase: MeOH/ H <sub>2</sub> O (20/80)<br>Detector: 218 nm                                                                                                                                    | 2021 | [23] |
| Pig, poultry<br>and cattle feed | ZEA                                                                                                          | 10             | IAC<br>25 g + 100 mL MeOH/ H <sub>2</sub> O (84/16) + SPE clean up. Dilute with PBS + pass through ZeaStar IAC column + elution with MeOH. Evaporate to dryness using N <sub>2</sub> . Reconstitution in mobile phase.                                                                      | LC-FLD<br>Column: ZORBAX Eclipse XDB-C18 (150 × 4.6 mm, 5 µm) at 30°C<br>Flow: 0.8 mL/min<br>Mobile phase: MeOH/ H <sub>2</sub> O / ACN (8/46/46)<br>Detector: 274/440 nm (λ <sub>ex</sub> /λ <sub>em</sub> )                                                                                    | 2021 | [23] |
| Cattle feed                     | NIV, DON, 3-ADON, 15-ADON, ZEA, AFG2, AFG1, AFB2, AFB1, DAS, AOH, FB1, FB2, FB3, OTA, AME, STER, ROQC, ENN B | 1.7-<br>317.7  | SPE<br>5 g + IS (ZAN, DOM) + 20 mL ACN/ H <sub>2</sub> O / acetic acid (79/20/1) + shake 1 h + centrifuge 3300g 15 min + SPE clean up + eluate with 25 mL solvent + 10 mL n-hexane + second SPE clean up. Evaporate to dryness using N <sub>2</sub> . Reconstitution in 150 µL mobile phase | LC-MS/MS<br>Column: Symmetry C18 (150 × 2.1 mm, 5 µm) at 25°C<br>Flow: 0.3 mL/min<br>Mobile phase: (A) H <sub>2</sub> O /MeOH/Acetic acid (94/5/1); (B) H <sub>2</sub> O/MeOH/Acetic acid (2/97/1), both containing 5 mM ammonium acetate, in gradient conditions<br>Detector: QqQ, ESI (+), MRM | 2021 | [24] |

**Table S1.** Analytical methods employed for mycotoxin analysis in feed (continuation)

| Matrix               | Analyte/s                                                 | LOQ<br>(µg/kg) | Sample preparation                                                                                                                                                                                                                                                                                  | Separation and detection technique                                                                                                                                                                                                                                             | year | Ref  |
|----------------------|-----------------------------------------------------------|----------------|-----------------------------------------------------------------------------------------------------------------------------------------------------------------------------------------------------------------------------------------------------------------------------------------------------|--------------------------------------------------------------------------------------------------------------------------------------------------------------------------------------------------------------------------------------------------------------------------------|------|------|
| Animal feed          | AFB1, AFB2, AFG1 AFG2, OTA, ZEA, DON, FB1, FB2, T-2, HT-2 | 0.5-500        | QuEChERS<br>5 g + 10 mL H <sub>2</sub> O 0.1% formic acid + 10 mL ACN + shake 4000 rpm 30 min + 4g MgSO <sub>4</sub> + 1 g NaCl + shake 4000 rpm 1 min + centrifuge 4000 rpm 10 min.<br>1 mL + 25 mg C18 + 25 mg PSA + centrifuge 10000 rpm 5 min.<br>0.4 mL + 0.5 mL H <sub>2</sub> O + 0.5 mL ACN | LC-MS/MS<br>Column: Imtakt Cardenza CD-C18 UP (150 × 2.0 mm, 3.0 µm) at 40°C<br>Flow: 0.4 mL/min<br>Mobile phase: (A) H <sub>2</sub> O 0.1% formic acid (B) ACN 0.1% formic acid, both containing 5 mM ammonium formate, in gradient conditions<br>Detector: QqQ, ESI (+), MRM | 2021 | [25] |
| Poultry feed         | AFs                                                       | n.i.           | SLE<br>5 g + 25 mL MeOH + filtration                                                                                                                                                                                                                                                                | ELISA<br>Neogen Veratox® Corporation USA                                                                                                                                                                                                                                       | 2022 | [26] |
| Poultry feed         | AFB1, AFB2, AFG1, AFG2, AFs                               | 0.5            | IAC<br>20 g + 2 g NaCl + 100 mL MeOH/ H <sub>2</sub> O (80/20) + 50 mL n-hexane + blend 5 min + filtration. 40 mL + 86 mL PBS + filtration. Pass through AflaCLEANTM IAC and elute with 2 mL MeOH                                                                                                   | LC-FLD<br>Column: ZORBAX SB-C18 (150× 4.6 mm, 3.5 µm) at 35°C<br>Flow: 1 mL/min<br>Mobile phase: H <sub>2</sub> O / ACN / MeOH (60/25/15)<br>Detector: 360/440 nm (λ <sub>ex</sub> /λ <sub>em</sub> )                                                                          | 2022 | [27] |
| Animal feed          | AFB1                                                      | 2              | SLE<br>20 g + 100 mL MeOH/ H <sub>2</sub> O (70/30) + shake 1 h + filtration                                                                                                                                                                                                                        | ELISA<br>BIO-SHIELD B1 (ProGnosis biotech)                                                                                                                                                                                                                                     | 2022 | [28] |
| Pig and poultry feed | AFs, Trichothecenes type B, FBs, ZEA                      | 0.5-10         | SPE<br>25 g + 100 mL ACN/ H <sub>2</sub> O (50/50) + blend 1 h + filtration. 2 mL + 0.1 mL acetic acid. 750 µL to SPE. Centifuge 10000 rpm 1 min                                                                                                                                                    | LC-MS/MS<br>Column: Gemini C18 (150 × 4.6 mm, 5 µm) at 40°C<br>Flow: 1 mL/min<br>Mobile phase: (A) H <sub>2</sub> O /acetic acid (199/1); (B) MeOH /acetic acid (199/1), both containing 2 mM ammonium acetate, in gradient conditions<br>Detector: QTRAP, ESI (±), SRM        | 2022 | [29] |
| Animal feed          | DON                                                       | 250            | SLE<br>20 g + 100 mL H <sub>2</sub> O + shake 1 h, 150 rpm, 25°C + filtration and dilution 1:4                                                                                                                                                                                                      | ELISA<br>AgraQuant® ELISA kits                                                                                                                                                                                                                                                 | 2022 | [30] |

**Table S1.** Analytical methods employed for mycotoxin analysis in feed (continuation)

| Matrix               | Analyte/s                                                 | LOQ<br>(µg/kg) | Sample preparation                                                                                                                                                                                                                                                                      | Separation and detection technique                                                                                                                                                                                                                                                                                     | year | Ref  |
|----------------------|-----------------------------------------------------------|----------------|-----------------------------------------------------------------------------------------------------------------------------------------------------------------------------------------------------------------------------------------------------------------------------------------|------------------------------------------------------------------------------------------------------------------------------------------------------------------------------------------------------------------------------------------------------------------------------------------------------------------------|------|------|
| Animal feed          | AFs, DON, FBs, OTA, T-2, ZEA                              | 1-250          | SLE<br>20 g + 100 mL MeOH/ H <sub>2</sub> O (70/30) + shake 1 h 150 rpm 25°C.<br>Filtrate<br>Dilution 1:20 with H <sub>2</sub> O for FBs, 1:5 with 70% MeOH for ZEA. No dilution for AFs, OTA, T-2                                                                                      | ELISA<br>AgraQuant® ELISA kits                                                                                                                                                                                                                                                                                         | 2022 | [30] |
| Pig and poultry feed | AFs, ZEA, Trichothecenes type B, FBs, OTA, T-2            | 0.5-10         | SPE<br>25 g + 100 mL ACN/ H <sub>2</sub> O (50/50) + blend 1 h + filtration. 2 mL + 0.1 mL acetic acid. 750 µL to SPE + eluate and centrifuge 10000 rpm 1 min                                                                                                                           | LC-MS/MS<br>Column: Gemini C18 (150 × 4.6 mm, 5 µm) at 40°C<br>Flow: 1 mL/min<br>Mobile phase: (A) H <sub>2</sub> O /acetic acid (199/1); (B) MeOH /acetic acid (199/1), both containing 2 mM ammonium acetate, in gradient conditions<br>Detector: QTRAP, ESI (±), SRM                                                | 2022 | [31] |
| Animal feed          | AFB1, OTA, ZEA, DON, FB1, T-2                             | 0.5-5          | IAC<br>5 g + 1 g NaCl + 20 mL ACN/ H <sub>2</sub> O (60:40) + vortex 30 min + centrifugation 6010 g 10 min at 4°C<br>2 mL + 48 mL PBS 1% tween 20. Pass through a multi-IAC column prepared in the laboratory.<br>Eluent evaporated and reconstituted in MeOH/ H <sub>2</sub> O (50:50) | LC-MS/MS<br>Column: UPLC® BEH C18 (100 × 2.1 mm, 1.7 µm) at 50°C<br>Flow: 0.3 mL/min<br>Mobile phase: (A) MeOH 0.05% formic acid, (B) H <sub>2</sub> O 0.15% formic acid containing 5 mM ammonium formate, in gradient conditions<br>Detector: QqQ, ESI (+), MRM                                                       | 2022 | [32] |
| Animal feed          | AFB1, AFB2, AFG1 AFG2, OTA, ZEA, DON, FB1, FB2, T-2, HT-2 | 0.2-125        | IAC<br>5 g + 20 mL (ACN/ H <sub>2</sub> O /acetic acid) (79:20:1) + shake 30 min + centrifuge 4000 rpm 10 min<br>3 mL + 147 mL PBS.<br>20 mL passed through 11+MycoMSPREP IAC                                                                                                           | LC-MS/MS<br>Column: Gemini C-18 (150 × 3 mm, 5 µm) at 40°C<br>Flow: 0.3 mL/min<br>Mobile phase: (A) 1 mM ammonium formate and H <sub>2</sub> O / MeOH /formic acid (94.9:5:0.1), (B) 1 mM ammonium formate and H <sub>2</sub> O / MeOH /formic acid (1.9:98:0.1) in gradient conditions<br>Detector: QqQ, ESI (+), MRM | 2022 | [33] |
| Animal feed          | AFB1, ZEA                                                 | 0.25-1.25      | SLE<br>5 g + 15 mL 70% MeOH/PBS (7:3) + vortex 5 min + centrifuge 1600g 5 min.<br>Dilute supernatant to 50 mL with 0.5% tween 20/PBS (0.5%)                                                                                                                                             | Lateral Flow Immunochromatographic Assay                                                                                                                                                                                                                                                                               | 2022 | [34] |

**Table S1.** Analytical methods employed for mycotoxin analysis in feed (continuation)

| Matrix                                    | Analyte/s                                      | LOQ<br>(µg/kg) | Sample preparation                                                                                                                                                                                                                                                                                                                    | Separation and detection technique                                                                                                                                                                                                                                                                                                                         | year | Ref  |
|-------------------------------------------|------------------------------------------------|----------------|---------------------------------------------------------------------------------------------------------------------------------------------------------------------------------------------------------------------------------------------------------------------------------------------------------------------------------------|------------------------------------------------------------------------------------------------------------------------------------------------------------------------------------------------------------------------------------------------------------------------------------------------------------------------------------------------------------|------|------|
| Cattle, pig,<br>poultry and<br>sheep feed | AFB1, AFB2, AFG1, AFG2, DON,<br>OTA, STER, ZEA | 0.8-84         | SPE<br>0.5 g + 5 mL ACN/ H <sub>2</sub> O / ortophosphoric acid (79/20/1) +<br>vortex 1 h + centrifugation 5500 rpm 10 min. 2 mL pass<br>through SPE Oasis prime HLB. 0.5 mL + 0.5 mL chloroform +<br>vortex 10 s + 5 mL H <sub>2</sub> O + vortex 30 s. 0.2 mL chloroform<br>phase evaporated and redissolved in 0.2 mL mobile phase | LC-FLD<br>Column: C18 Cortecs T3 (150 × 4.6 mm, 2.7 µm) at<br>40°C<br>Flow: 1.4 mL/min<br>Mobile phase: (A) H <sub>2</sub> O (B) ACN (C) MeOH, all<br>acidified with 0.1% ortophosphoric acid, in<br>gradient conditions.<br>Detector: 365/440 nm (λ <sub>ex</sub> /λ <sub>em</sub> ) AFs, 234/469 nm<br>(λ <sub>ex</sub> /λ <sub>em</sub> ) OTA, OTB, ZEA | 2023 | [35] |
| Pig and<br>poultry feed                   | AFs, Trichothecenes type B, FBs, ZEA           | 0.5-10         | SPE<br>25 g + 100 mL ACN/ H <sub>2</sub> O (50/50) + blend 1 h + filtration. 2<br>mL + 0.1 mL acetic acid. 750 µL to SPE. Centifuge 10000 rpm<br>1 min                                                                                                                                                                                | LC-MS/MS<br>Column: Gemini C18 (150 × 4.6 mm, 5 µm) at<br>40°C<br>Flow: 1 mL/min<br>Mobile phase: (A) H <sub>2</sub> O /acetic acid (199/1); (B)<br>MeOH /acetic acid (199/1) both containing 2 mM<br>ammonium acetate, in gradient conditions<br>Detector: QTRAP, ESI (±), SRM                                                                            | 2023 | [36] |

**Table S2:** Levels of mycotoxins in feed obtained from the bibliographic search (2019-2023)

| Analyte   | Matrix       | n   | % Positive sample (>LOQ) | Mean (µg/kg) | Maximum (µg/kg) | Origen of the samples | Collection of samples | Ref. |
|-----------|--------------|-----|--------------------------|--------------|-----------------|-----------------------|-----------------------|------|
| Total AFs | Pig feed     | 823 | 58.0                     | 1.6          | >20             | Taiwan                | 2015-2017             | [1]  |
| DON       |              |     | 91.4                     | 615.5        | >5000           |                       |                       |      |
| ZEA       |              |     | 70.2                     | 46.0         | >1000           |                       |                       |      |
| Total FBs |              |     | 50.4                     | 1100         | >5000           |                       |                       |      |
| Total AFs | Animal Feed  | 148 | 1.0                      | 4.0          | 4.0             | China                 | 2021                  | [29] |
|           | Poultry feed | 434 | 32                       | 14           | 206.0           |                       |                       |      |
|           | Pig feed     | 350 | 21.0                     | 4.0          | 49.0            |                       |                       |      |
| ZEA       | Pig feed     | 350 | 99                       | 88           | 857             | China                 | 2021                  | [29] |
|           | Poultry feed | 434 | 94                       | 164          | 1490            |                       |                       |      |
|           | Animal feed  | 148 | 91                       | 87           | 499             |                       |                       |      |
| Total FBs | Pig feed     | 350 | 99                       | 966          | 8539            | China                 | 2021                  | [29] |
|           | Poultry feed | 434 | 99                       | 1263         | 12776           |                       |                       |      |
|           | Animal feed  | 148 | 91                       | 553          | 4618            |                       |                       |      |
| Total AFs | Animal Feed  | 782 | 60.2                     | 6.22         | 66.66           | Brazil                | 2017-2021             | [30] |
| DON       |              | 741 | 67.8                     | 690.0        | 4969.06         |                       |                       |      |
| ZEA       |              | 779 | 71.0                     | 43.40        | 2503.86         |                       |                       |      |
| OTA       |              | 680 | 34.3                     | 6.34         | 87.82           |                       |                       |      |
| Total FBs |              | 792 | 45.4                     | 970.0        | 17490.0         |                       |                       |      |
| T-2       |              | 681 | 24.7                     | 24.11        | 135.23          |                       |                       |      |
| Total AFs | Animal Feed  | 85  | 1.0                      | 3.0          | 3.0             | China                 | 2020                  | [31] |
|           | Poultry feed | 270 | 28                       | 7            | 51.0            |                       |                       |      |
|           | Pig feed     | 124 | 22.0                     | 9.0          | 85.0            |                       |                       |      |

**Table S2:** Raw data obtained from the bibliographic search (2019-2023) (Continuation)

| Analyte   | Matrix       | n    | % Positive sample (>LOQ) | Mean (µg/kg) | Maximum (µg/kg) | Origen of the samples | Collection of samples | Ref. |
|-----------|--------------|------|--------------------------|--------------|-----------------|-----------------------|-----------------------|------|
| ZEA       | Pig feed     | 124  | 51                       | 73           | 331             | China                 | 2020                  | [31] |
|           | Poultry feed | 270  | 56                       | 123          | 1094            |                       |                       |      |
|           | Animal feed  | 85   | 68                       | 111          | 719             |                       |                       |      |
| OTA       | Pig feed     | 124  | 5                        | 4            | 5.4             | China                 | 2020                  | [31] |
|           | Poultry feed | 270  | 5                        | 50           | 27              |                       |                       |      |
|           | Animal feed  | 85   | n.i.                     | n.i.         | n.i.            |                       |                       |      |
| Total FBs | Pig feed     | 124  | 95                       | 871          | 4511            | China                 | 2020                  | [31] |
|           | Poultry feed | 270  | 91                       | 990          | 4136            |                       |                       |      |
|           | Animal feed  | 85   | 88                       | 370          | 1287            |                       |                       |      |
| T-2       | Pig feed     | 124  | 1                        | 33           | 33              | China                 | 2020                  | [31] |
|           | Poultry feed | 270  | n.i.                     | n.i.         | n.i.            |                       |                       |      |
|           | Animal feed  | 85   | n.i.                     | n.i.         | n.i.            |                       |                       |      |
| Total AFs | Animal Feed  | 470  | 2.8                      | 8.5          | 39.0            | China                 | 2017-2021             | [36] |
|           | Poultry feed | 1857 | 30.0                     | 15.8         | 206.0           |                       |                       |      |
|           | Pig feed     | 1418 | 21.9                     | 16.9         | 245.0           |                       |                       |      |
| ZEA       | Pig feed     | 1418 | 57.12                    | 83.39        | 857             | China                 | 2017-2021             | [36] |
|           | Poultry feed | 1857 | 71.46                    | 120.13       | 1490            |                       |                       |      |
|           | Animal feed  | 470  | 71.91                    | 89.36        | 719             |                       |                       |      |
| Total FBs | Pig feed     | 1418 | 92.95                    | 1116.0       | 13254           | China                 | 2017-2021             | [36] |
|           | Poultry feed | 1857 | 95.85                    | 1437.82      | 17052           |                       |                       |      |
|           | Animal feed  | 470  | 93.36                    | 554.15       | 7619            |                       |                       |      |

**Table S2:** Raw data obtained from the bibliographic search (2019-2023) (Continuation)

| Analyte | Matrix       | n   | % Positive sample (>LOQ) | Mean (µg/kg) | Maximum (µg/kg) | Origen of the samples | Collection of samples | Ref. |
|---------|--------------|-----|--------------------------|--------------|-----------------|-----------------------|-----------------------|------|
| AFB1    | Animal feed  | 45  | 13                       | n.i.         | 390             | Brazil                | 2016                  | [3]  |
| AFB2    |              |     | 4                        | n.i.         | 5.4             |                       |                       |      |
| AFG1    |              |     | 4                        | n.i.         | 12              |                       |                       |      |
| AFG2    |              |     | 0                        | n.i.         | n.i.            |                       |                       |      |
| DON     | Animal feed  | 45  | 44                       | n.i.         | 2300            | Brazil                | 2016                  | [3]  |
| ZEA     |              |     | 29                       | n.i.         | 520             |                       |                       |      |
| OTA     |              |     | 2                        | n.i.         | 11              |                       |                       |      |
| FB1     | Animal feed  | 45  | 93                       | n.i.         | 53000           | Brazil                | 2016                  | [3]  |
| FB2     |              |     | 87                       | n.i.         | 2800            |                       |                       |      |
| AFB1    | Poultry feed | 105 | 98                       | 0.2          | 0.9             | South Africa          | 2015                  | [4]  |
| AFB2    |              |     | 100                      | 0.4          | 7.1             |                       |                       |      |
| AFG1    |              |     | 97                       | 0.7          | 5.2             |                       |                       |      |
| AFG2    |              |     | 82                       | 0.5          | 1.6             |                       |                       |      |
| DON     | Poultry feed | 105 | 98                       | 37.8         | 154.0           | South Africa          | 2015                  | [4]  |
| 3-ADON  |              |     | 95                       | 1.6          | 12.9            |                       |                       |      |
| 15-ADON |              |     | 35                       | 8.9          | 44.9            |                       |                       |      |
| ZEA     | Poultry feed | 105 |                          | 71.2         | 428.9           | South Africa          | 2015                  | [4]  |
| α-ZEL   |              |     | 99                       | 5.4          | 19.9            |                       |                       |      |
| β-ZEL   |              |     |                          | 3.8          | 22.1            |                       |                       |      |
| OTA     | Poultry feed | 105 | 0                        | n.i.         | n.i.            | South Africa          | 2015                  | [4]  |
| FB1     | Poultry feed | 105 |                          | 1075.6       | 7125.3          | South Africa          | 2015                  | [4]  |
| FB2     |              |     | 100                      | 28.5         | 125.1           |                       |                       |      |
| FB3     |              |     |                          | 22.2         | 115.1           |                       |                       |      |

**Table S2:** Raw data obtained from the bibliographic search (2019-2023) (Continuation)

| Analyte | Matrix       | n   | % Positive sample (>LOQ) | Mean (µg/kg) | Maximum (µg/kg) | Origen of the samples | Collection of samples | Ref. |
|---------|--------------|-----|--------------------------|--------------|-----------------|-----------------------|-----------------------|------|
| T-2     | Poultry feed | 105 | 100                      | 3.1          | 15.3            | South Africa          | 2015                  | [4]  |
| HT-2    |              |     |                          | 1.9          | 5.9             |                       |                       |      |
| AME     | Poultry feed | 105 | 100                      | 23.1         | 155.5           | South Africa          | 2015                  | [4]  |
| AFB1    | Poultry feed | 43  | n.i.                     | n.i.         | n.i.            | Tunisia               | 2016-2017             | [5]  |
|         | Cattle feed  | 35  | n.i.                     | n.i.         | n.i.            |                       |                       |      |
|         | Sheep feed   | 16  | n.i.                     | n.i.         | n.i.            |                       |                       |      |
| AFB2    | Poultry feed | 43  | n.i.                     | n.i.         | n.i.            | Tunisia               | 2016-2017             | [5]  |
|         | Cattle feed  | 35  | n.i.                     | n.i.         | n.i.            |                       |                       |      |
|         | Sheep feed   | 16  | n.i.                     | n.i.         | n.i.            |                       |                       |      |
| AFG1    | Poultry feed | 43  | n.i.                     | n.i.         | n.i.            | Tunisia               | 2016-2017             | [5]  |
|         | Cattle feed  | 35  | n.i.                     | n.i.         | n.i.            |                       |                       |      |
|         | Sheep feed   | 16  | n.i.                     | n.i.         | n.i.            |                       |                       |      |
| AFG2    | Poultry feed | 43  | 2                        | 42.5         | 42.5            | Tunisia               | 2016-2017             | [5]  |
|         | Cattle feed  | 35  | n.i.                     | n.i.         | n.i.            |                       |                       |      |
|         | Sheep feed   | 16  | n.i.                     | n.i.         | n.i.            |                       |                       |      |
| DON     | Poultry feed | 43  | 100                      | 249.8        | 249.8           | Tunisia               | 2016-2017             | [5]  |
|         | Cattle feed  | 35  | 74                       | 26.6         | 146.1           |                       |                       |      |
|         | Sheep feed   | 16  | 6                        | 105.1        | 25.3            |                       |                       |      |
| 3-ADON  | Poultry feed | 43  | 21                       | 158          | 167.9           | Tunisia               | 2016-2017             | [5]  |
|         | Cattle feed  | 35  | 6                        | 29.8         | 168.7           |                       |                       |      |
|         | Sheep feed   | 16  | n.i.                     | n.i.         | n.i.            |                       |                       |      |



**Table S2:** Raw data obtained from the bibliographic search (2019-2023) (Continuation)

| Analyte | Matrix       | n  | % Positive sample (>LOQ) | Mean (µg/kg) | Maximum (µg/kg) | Origen of the samples | Collection of samples | Ref. |
|---------|--------------|----|--------------------------|--------------|-----------------|-----------------------|-----------------------|------|
| 15-ADON | Poultry feed | 43 | 5                        | 836.9        | 840.7           | Tunisia               | 2016-2017             | [5]  |
|         | Cattle feed  | 35 | 17                       | 28.4         | 132.4           |                       |                       |      |
|         | Sheep feed   | 16 | 25                       | 18.7         | 19.0            |                       |                       |      |
| ZEA     | Poultry feed | 43 | n.i.                     | n.i.         | n.i.            | Tunisia               | 2016-2017             | [5]  |
|         | Cattle feed  | 35 | 3                        | 35.1         | 35.1            |                       |                       |      |
|         | Sheep feed   | 16 | n.i.                     | n.i.         | n.i.            |                       |                       |      |
| OTA     | Poultry feed | 43 | n.i.                     | n.i.         | n.i.            | Tunisia               | 2016-2017             | [5]  |
|         | Cattle feed  | 35 | n.i.                     | n.i.         | n.i.            |                       |                       |      |
|         | Sheep feed   | 16 | 31                       | 3.9          | 5.9             |                       |                       |      |
| T-2     | Poultry feed | 43 | 5                        | 935.1        | 956.8           | Tunisia               | 2016-2017             | [5]  |
|         | Cattle feed  | 35 | 9                        | 18.3         | 26.5            |                       |                       |      |
|         | Sheep feed   | 16 | n.i.                     | n.i.         | n.i.            |                       |                       |      |
| HT-2    | Poultry feed | 43 | 9                        | 119.8        | 119.8           | Tunisia               | 2016-2017             | [5]  |
|         | Cattle feed  | 35 | 37                       | 21.0         | 173.4           |                       |                       |      |
|         | Sheep feed   | 16 | 13                       | 16.6         | 13.1            |                       |                       |      |
| NIV     | Poultry feed | 43 | n.i.                     | n.i.         | n.i.            | Tunisia               | 2016-2017             | [5]  |
|         | Cattle feed  | 35 | n.i.                     | n.i.         | n.i.            |                       |                       |      |
|         | Sheep feed   | 16 | n.i.                     | n.i.         | n.i.            |                       |                       |      |
| AME     | Poultry feed | 43 | 2                        | 109.7        | 109.7           | Tunisia               | 2016-2017             | [5]  |
|         | Cattle feed  | 35 | n.i.                     | n.i.         | n.i.            |                       |                       |      |
|         | Sheep feed   | 16 | n.i.                     | n.i.         | n.i.            |                       |                       |      |
| AOH     | Poultry feed | 43 | 2                        | 324.3        | 324.3           | Tunisia               | 2016-2017             | [5]  |
|         | Cattle feed  | 35 | n.i.                     | n.i.         | n.i.            |                       |                       |      |
|         | Sheep feed   | 16 | n.i.                     | n.i.         | n.i.            |                       |                       |      |

**Table S2:** Raw data obtained from the bibliographic search (2019-2023) (Continuation)

| Analyte | Matrix       | n  | % Positive sample (>LOQ) | Mean (µg/kg) | Maximum (µg/kg) | Origen of the samples | Collection of samples | Ref. |
|---------|--------------|----|--------------------------|--------------|-----------------|-----------------------|-----------------------|------|
| NEO     | Poultry feed | 43 | n.i.                     | n.i.         | n.i.            | Tunisia               | 2016-2017             | [5]  |
|         | Cattle feed  | 35 | n.i.                     | n.i.         | n.i.            |                       |                       |      |
|         | Sheep feed   | 16 | n.i.                     | n.i.         | n.i.            |                       |                       |      |
| DAS     | Poultry feed | 43 | 14                       | 118.8        | 219.2           | Tunisia               | 2016-2017             | [5]  |
|         | Cattle feed  | 35 | n.i.                     | n.i.         | n.i.            |                       |                       |      |
|         | Sheep feed   | 16 | n.i.                     | n.i.         | n.i.            |                       |                       |      |
| TENT    | Poultry feed | 43 | n.i.                     | n.i.         | n.i.            | Tunisia               | 2016-2017             | [5]  |
|         | Cattle feed  | 35 | 6                        | 2.8          | 2.9             |                       |                       |      |
|         | Sheep feed   | 16 | 6                        | 7.0          | 7.0             |                       |                       |      |
| BEA     | Poultry feed | 43 | 100                      | 7.1          | 29.3            | Tunisia               | 2016-2017             | [5]  |
|         | Cattle feed  | 35 | 69                       | 3.1          | 5.7             |                       |                       |      |
|         | Sheep feed   | 16 | n.i.                     | n.i.         | n.i.            |                       |                       |      |
| ENNA    | Poultry feed | 43 | 37                       | 4.0          | 12.6            | Tunisia               | 2016-2017             | [5]  |
|         | Cattle feed  | 35 | 20                       | 0.7          | 0.9             |                       |                       |      |
|         | Sheep feed   | 16 | 25                       | 2.9          | 4.3             |                       |                       |      |
| ENNA1   | Poultry feed | 43 | 51                       | 1.5          | 5.0             | Tunisia               | 2016-2017             | [5]  |
|         | Cattle feed  | 35 | 77                       | 1.8          | 4.3             |                       |                       |      |
|         | Sheep feed   | 16 | 25                       | 10.9         | 20.5            |                       |                       |      |
| ENNB    | Poultry feed | 43 | 79                       | 6.7          | 39.8            | Tunisia               | 2016-2017             | [5]  |
|         | Cattle feed  | 35 | 80                       | 9.0          | 21.9            |                       |                       |      |
|         | Sheep feed   | 16 | 69                       | 12.5         | 21.7            |                       |                       |      |
| ENNB1   | Poultry feed | 43 | 49                       | 3.5          | 15.7            | Tunisia               | 2016-2017             | [5]  |
|         | Cattle feed  | 35 | n.i.                     | n.i.         | n.i.            |                       |                       |      |
|         | Sheep feed   | 16 | 38                       | 0.8          | 2.8             | 7.2                   | 12.8                  |      |

**Table S2:** Raw data obtained from the bibliographic search (2019-2023) (Continuation)

| Analyte | Matrix      | n   | % Positive sample (>LOQ) | Mean (µg/kg) | Maximum (µg/kg) | Origen of the samples | Collection of samples | Ref. |
|---------|-------------|-----|--------------------------|--------------|-----------------|-----------------------|-----------------------|------|
| AFB1    | Cattle feed | 17  | 47                       | 1.5          | 5.9             | Egypt                 | 2014-2015             | [6]  |
| AFB2    |             | 17  | 6                        | 0.5          | 0.5             |                       |                       |      |
| AFG1    |             | 17  | n.i.                     | n.i.         | n.i.            |                       |                       |      |
| AFG2    |             | 17  | n.i.                     | n.i.         | n.i.            |                       |                       |      |
| ZEA     | Cattle feed | 17  | 24                       | 8.1          | 11.9            | Egypt                 | 2014-2015             | [6]  |
| OTA     |             |     | n.i.                     | n.i.         | n.i.            |                       |                       |      |
| AFB1    | Pig feed    | 228 | 3.07                     | 0.94         | 2.91            | Spain                 | 2017                  | [7]  |
| AFB2    |             |     | 1.32                     | 0.60         | 1.06            |                       |                       |      |
| AFG1    |             |     | 0.88                     | 0.33         | 0.44            |                       |                       |      |
| AFG2    |             |     | 0                        | -            | -               |                       |                       |      |
| DON     | Pig feed    | 228 | 4.39                     | 237          | 555             | Spain                 | 2017                  | [7]  |
| ZEA     |             |     | 7.02                     | 741          | 7681            |                       |                       |      |
| OTA     |             |     | 0                        | -            | -               |                       |                       |      |
| FB1     | Pig feed    | 228 | 50                       | 403          | 3959            | Spain                 | 2017                  | [7]  |
| FB2     |             |     | 29.82                    | 184          | 961             |                       |                       |      |
| T-2     | Pig feed    | 228 | 0.88                     | 31.9         | 35.9            | Spain                 | 2017                  | [7]  |
| HT-2    |             |     | 0.88                     | 117          | 123             |                       |                       |      |
| BEA     | Pig feed    | 228 | 93.42                    | 20.7         | 747             | Spain                 | 2017                  | [7]  |
| ENNA    |             |     | 5.26                     | 9.82         | 64.9            |                       |                       |      |
| ENNA1   |             |     | 40.79                    | 19.0         | 140             |                       |                       |      |
| ENNB    |             |     | 100                      | 118          | 1222            |                       |                       |      |
| ENNB1   |             |     | 53.51                    | 34.3         | 247             |                       |                       |      |

**Table S2:** Raw data obtained from the bibliographic search (2019-2023) (Continuation)

| Analyte            | Matrix       | n   | % Positive sample (>LOQ) | Mean (µg/kg) | Maximum (µg/kg) | Origen of the samples | Collection of samples | Ref. |
|--------------------|--------------|-----|--------------------------|--------------|-----------------|-----------------------|-----------------------|------|
| CIT                | Pig feed     | 228 | 14.04                    | 147          | 512             | Spain                 | 2017                  | [7]  |
| FUS-X              |              |     | 5.70                     | 291          | 821             |                       |                       |      |
| STER               |              |     | 2.19                     | 104          | 308             |                       |                       |      |
| AFB1               | Poultry feed | 30  | 83.3                     | 74           | 760             | Nigeria               | 2013                  | [8]  |
| AFB2               |              |     | 50.0                     | 21           | 188             |                       |                       |      |
| AFG1               |              |     | 56.7                     | 19           | 79              |                       |                       |      |
| AFG2               |              |     | 13.3                     | 3.5          | 7.6             |                       |                       |      |
| ZEA                | Poultry feed | 30  | 83.3                     | 9.3          | 71              | Nigeria               | 2013                  | [8]  |
| ZEA-sulfate        |              |     | 13.3                     | 56           | 162             |                       |                       |      |
| OTA                | Poultry feed | 30  | 26.7                     | 5.4          | 15              | Nigeria               | 2013                  | [8]  |
| OTB                |              |     | 20.0                     | 9.3          | 24              |                       |                       |      |
| FB1                | Poultry feed | 30  | 96.7                     | 1014         | 3760            | Nigeria               | 2013                  | [8]  |
| FB2                |              |     | 93.3                     | 310          | 870             |                       |                       |      |
| FB3                |              |     | 90.0                     | 62           | 149             |                       |                       |      |
| FB4                |              |     | 96.7                     | 623          | 168             |                       |                       |      |
| NIV                | Poultry feed | 30  | 23.3                     | 114          | 647             | Nigeria               | 2013                  | [8]  |
| AOH                |              |     | 40.0                     | 2.7          | 8.6             |                       |                       |      |
| TENT               |              |     | 70.0                     | 44           | 315             |                       |                       |      |
| BEA                |              |     | 100                      | 13           | 127             |                       |                       |      |
| CIT                |              |     | 16.7                     | 522          | 2340            |                       |                       |      |
| Cyclopiazonic acid |              |     | 10.0                     | 39           | 49              |                       |                       |      |
| MON                |              |     | 93.3                     | 62           | 900             |                       |                       |      |

**Table S2:** Raw data obtained from the bibliographic search (2019-2023) (Continuation)

| Analyte   | Matrix       | n    | % Positive sample (>LOQ) | Mean (µg/kg) | Maximum (µg/kg) | Origen of the samples | Collection of samples | Ref. |
|-----------|--------------|------|--------------------------|--------------|-----------------|-----------------------|-----------------------|------|
| Total AFs | Animal feed  | 365  | n.i.                     | 88.6         | n.i.            | Rwanda                | 2017                  | [2]  |
| Total FBs |              |      | n.i.                     | 1480         | n.i.            |                       |                       |      |
| Total AFs | Cattle feed  | 1180 | n.i.                     | 108.8        | n.i.            | Rwanda                | 2017                  | [2]  |
| Total FBs |              |      | n.i.                     | 1520         | n.i.            |                       |                       |      |
| Total AFs | Poultry feed | 1726 | n.i.                     | 103.8        | n.i.            | Rwanda                | 2017                  | [2]  |
| Total FBs |              |      | n.i.                     | 1210         | n.i.            |                       |                       |      |
| AFB1      | Pig feed     | 100  | 34                       | 1.7          | 14.2            | Thailand              | -                     | [13] |
|           | Poultry feed | 100  | 77                       | 8.2          | 326.4           |                       |                       |      |
|           | Cattle feed  | 100  | 32                       | 1.6          | 14.9            |                       |                       |      |
| AFB2      | Pig feed     | 100  | 13                       | 0.9          | 4.1             | Thailand              | -                     | [13] |
|           | Poultry feed | 100  | 35                       | 2.4          | 49.9            |                       |                       |      |
|           | Cattle feed  | 100  | 8                        | 0.9          | 2.4             |                       |                       |      |
| AFG1      | Pig feed     | 100  | 4                        | 0.5          | 1.6             | Thailand              | -                     | [13] |
|           | Poultry feed | 100  | 25                       | 0.6          | 0.86            |                       |                       |      |
|           | Cattle feed  | 100  | 12                       | 0.5          | 1.6             |                       |                       |      |
| AFG2      | Pig feed     | 100  | 1                        | 0.66         | 0.66            | Thailand              | -                     | [13] |
|           | Poultry feed | 100  | n.i.                     | n.i.         | n.i.            |                       |                       |      |
|           | Cattle feed  | 100  | n.i.                     | n.i.         | n.i.            |                       |                       |      |
| DON       | Pig feed     | 100  | 43                       | 215          | 631.9           | Thailand              | -                     | [13] |
|           | Poultry feed | 100  | 31                       | 304.6        | 1430.8          |                       |                       |      |
|           | Cattle feed  | 100  | 37                       | 167.8        | 538.8           |                       |                       |      |

**Table S2:** Raw data obtained from the bibliographic search (2019-2023) (Continuation)

| Analyte | Matrix       | n   | % Positive sample (>LOQ) | Mean (µg/kg) | Maximum (µg/kg) | Origen of the samples | Collection of samples | Ref. |
|---------|--------------|-----|--------------------------|--------------|-----------------|-----------------------|-----------------------|------|
| 3-ADON  | Pig feed     | 100 | n.i.                     | n.i.         | n.i.            | Thailand              | -                     | [13] |
|         | Poultry feed | 100 | 1                        | 45.6         | 45.6            |                       |                       |      |
|         | Cattle feed  | 100 | 3                        | 36.0         | 46.6            |                       |                       |      |
| 15-ADON | Pig feed     | 100 | 16                       | 30.8         | 83.2            | Thailand              | -                     | [13] |
|         | Poultry feed | 100 | 26                       | 31.7         | 57.1            |                       |                       |      |
|         | Cattle feed  | 100 | 36                       | 35.9         | 68.2            |                       |                       |      |
| ZEA     | Pig feed     | 100 | 91                       | 17.4         | 169.2           | Thailand              | -                     | [13] |
|         | Poultry feed | 100 | 72                       | 30.2         | 235.8           |                       |                       |      |
|         | Cattle feed  | 100 | 46                       | 26.1         | 98.4            |                       |                       |      |
| OTA     | Pig feed     | 100 | n.i.                     | n.i.         | n.i.            | Thailand              | -                     | [13] |
|         | Poultry feed | 100 | 1                        | 3.1          | 3.1             |                       |                       |      |
|         | Cattle feed  | 100 | n.i.                     | n.i.         | n.i.            |                       |                       |      |
| FB1     | Pig feed     | 100 | 85                       | 102.4        | 464.8           | Thailand              | -                     | [13] |
|         | Poultry feed | 100 | 96                       | 451.7        | 2645.5          |                       |                       |      |
|         | Cattle feed  | 100 | 62                       | 88.1         | 731.0           |                       |                       |      |
| FB2     | Pig feed     | 100 | 77                       | 31.08        | 136.1           | Thailand              | -                     | [13] |
|         | Poultry feed | 100 | 91                       | 123.2        | 573.3           |                       |                       |      |
|         | Cattle feed  | 100 | 45                       | 26.1         | 252.2           |                       |                       |      |
| T-2     | Pig feed     | 100 | n.i.                     | n.i.         | n.i.            | Thailand              | -                     | [13] |
|         | Poultry feed | 100 | 4                        | 2.6          | 3.2             |                       |                       |      |
|         | Cattle feed  | 100 | 2                        | 4.5          | 5.5             |                       |                       |      |
| HT-2    | Pig feed     | 100 | 7                        | 9.6          | 19.3            | Thailand              | -                     | [13] |
|         | Poultry feed | 100 | 7                        | 6.6          | 10.0            |                       |                       |      |
|         | Cattle feed  | 100 | 1                        | 15.23        | 15.23           |                       |                       |      |

**Table S2:** Raw data obtained from the bibliographic search (2019-2023) (Continuation)

| Analyte   | Matrix       | n   | % Positive sample (>LOQ) | Mean (µg/kg) | Maximum (µg/kg) | Origen of the samples | Collection of samples | Ref. |
|-----------|--------------|-----|--------------------------|--------------|-----------------|-----------------------|-----------------------|------|
| NIV       | Pig feed     | 100 | 18                       | 46.0         | 165.4           | Thailand              | -                     | [13] |
|           | Poultry feed | 100 | 32                       | 103.4        | 626.0           |                       |                       |      |
|           | Cattle feed  | 100 | 6                        | 51.2         | 117.5           |                       |                       |      |
| NEO       | Pig feed     | 100 | n.i.                     | n.i.         | n.i.            | Thailand              | -                     | [13] |
|           | Poultry feed | 100 | n.i.                     | n.i.         | n.i.            |                       |                       |      |
|           | Cattle feed  | 100 | n.i.                     | n.i.         | n.i.            |                       |                       |      |
| DAS       | Pig feed     | 100 | 2                        | 4.7          | 5.1             | Thailand              | -                     | [13] |
|           | Poultry feed | 100 | 3                        | 3.1          | 3.6             |                       |                       |      |
|           | Cattle feed  | 100 | 1                        | 4.36         | 4.36            |                       |                       |      |
| FUS-X     | Pig feed     | 100 | n.i.                     | n.i.         | n.i.            | Thailand              | -                     | [13] |
|           | Poultry feed | 100 | 3                        | 48.0         | 61.9            |                       |                       |      |
|           | Cattle feed  | 100 | n.i.                     | n.i.         | n.i.            |                       |                       |      |
| AFB1      | Cattle feed  | 193 | 12                       | n.i.         | 4.66            | Spain                 | 2016-2018             | [15] |
| AFB2      |              |     | 5                        | n.i.         | 0.41            |                       |                       |      |
| AFG1      |              |     | 24                       | n.i.         | 6.45            |                       |                       |      |
| AFG2      |              |     | 7                        | n.i.         | 0.57            |                       |                       |      |
| AFB1      | Animal feed  | 51  | 61                       | 2.42         | 5.0             | Lithuania             | 2019-2020             | [18] |
| DON       |              |     | 55                       | 283.94       | 500             |                       |                       |      |
| ZEA       |              |     | 49                       | 377.60       | 700             |                       |                       |      |
| T-2       |              |     | 29                       | 106.05       | 246.7           |                       |                       |      |
| AFB1      | Animal feed  | 34  | n.i.                     | n.i.         | n.i.            | Thailand              | 2018-2019             | [20] |
| DON       |              |     | 26.5                     | 61.84        | 122.44          |                       |                       |      |
| DON-3gluc |              |     | 26.5                     | 10.92        | 28.78           |                       |                       |      |
| ZEA       |              |     | 82.4                     | 5.16         | 12.44           |                       |                       |      |

**Table S2:** Raw data obtained from the bibliographic search (2019-2023) (Continuation)

| Analyte | Matrix       | n   | % Positive sample (>LOQ) | Mean (µg/kg) | Maximum (µg/kg) | Origen of the samples | Collection of samples | Ref. |
|---------|--------------|-----|--------------------------|--------------|-----------------|-----------------------|-----------------------|------|
| FB1     | Animal feed  | 34  | 41.2                     | 26.81        | 60.8            | Thailand              | 2018-2019             | [20] |
| FB2     |              |     | 14.7                     | 12.52        | 18.28           |                       |                       |      |
| FB3     |              |     | n.i.                     | n.i.         | n.i.            |                       |                       |      |
| AFB1    | Cattle feed  | 60  | 55                       | 0.61         | 5.17            | Spain                 | 2015-2016             | [21] |
| AFB1    | Pig feed     | 620 | 100                      | 4.1          | 59.7            | China                 | 2018-2020             | [23] |
|         | Poultry feed | 571 | 99.9                     | 4.9          | 57.4            |                       |                       |      |
|         | Cattle feed  | 225 | 100                      | 9.5          | 77.5            |                       |                       |      |
| DON     | Pig feed     | 620 | 99.6                     | 659.3        | 3712.2          | China                 | 2018-2020             | [23] |
|         | Poultry feed | 571 | 99.7                     | 660.8        | 2970.1          |                       |                       |      |
|         | Cattle feed  | 225 | 99.3                     | 752.1        | 2254.7          |                       |                       |      |
| ZEA     | Pig feed     | 620 | 99.4                     | 81.5         | 1599.0          | China                 | 2018-2020             | [23] |
|         | Poultry feed | 571 | 100                      | 108.0        | 852.8           |                       |                       |      |
|         | Cattle feed  | 225 | 99.3                     | 98.2         | 906.9           |                       |                       |      |
| AFB1    | Cattle feed  | 77  | 3.9                      | 26.1         | 30.2            | South Africa          | 2018-2019             | [24] |
| AFB2    |              |     | 3.9                      | 4.4          | 6.8             |                       |                       |      |
| AFG1    |              |     | 2.6                      | 20.2         | 23.1            |                       |                       |      |
| AFG2    |              |     | 1.3                      | 11.1         | 11.1            |                       |                       |      |
| DON     | Cattle feed  | 77  | 63.6                     | 477.7        | 2385.4          | South Africa          | 2018-2019             | [24] |
| 3-ADON  |              |     | 16.9                     | 55.5         | 300.0           |                       |                       |      |
| 15-ADON |              |     | 20.8                     | 169.6        | 858.8           |                       |                       |      |
| ZEA     | Cattle feed  | 77  | 9.1                      | 666.0        | 1793.7          | South Africa          | 2018-2019             | [24] |
| OTA     |              |     | 3.9                      | 85.6         | 187.9           |                       |                       |      |
| FB1     | Cattle feed  | 77  | 23.4                     | 189.8        | 485.2           | South Africa          | 2018-2019             | [24] |
| FB2     |              |     | 19.5                     | 132.4        | 416.9           |                       |                       |      |
| FB3     |              |     | 1.3                      | n.i.         | n.i.            |                       |                       |      |



**Table S2:** Raw data obtained from the bibliographic search (2019-2023) (Continuation)

| Analyte | Matrix       | n   | % Positive sample (>LOQ) | Mean (µg/kg) | Maximum (µg/kg) | Origen of the samples | Collection of samples | Ref. |
|---------|--------------|-----|--------------------------|--------------|-----------------|-----------------------|-----------------------|------|
| NIV     | Cattle feed  | 77  | 5.2                      | 36.9         | 36.9            | South Africa          | 2018-2019             | [24] |
| AME     |              |     | 6.5                      | 229.2        | 603.2           |                       |                       |      |
| AOH     |              |     | 42.8                     | 279.2        | 3088.2          |                       |                       |      |
| DAS     |              |     | 1.3                      | 3.4          | 3.4             |                       |                       |      |
| ENNB    |              |     | 32.5                     | 1143.1       | 14230.4         |                       |                       |      |
| STER    |              |     | 45.5                     | 25.8         | 139.1           |                       |                       |      |
| ROQC    |              |     | 2.6                      | 377.2        | 699.9           |                       |                       |      |
| AFB1    | Cattle feed  | 100 | 12                       | 3.4          | 5.4             | Spain                 | 2019-2020             | [35] |
|         | Pig feed     | 100 | 7                        | 5.3          | 6.2             |                       |                       |      |
|         | Poultry feed | 100 | 13                       | 5.0          | 6.9             |                       |                       |      |
|         | Sheep feed   | 100 | 12                       | 4.4          | 6.1             |                       |                       |      |
| AFB2    | Cattle feed  | 100 | 11                       | 1.5          | 3.2             | Spain                 | 2019-2020             | [35] |
|         | Pig feed     | 100 | 14                       | 2.1          | 3.9             |                       |                       |      |
|         | Poultry feed | 100 | 11                       | 1.7          | 3.1             |                       |                       |      |
|         | Sheep feed   | 100 | 15                       | 2.0          | 4.9             |                       |                       |      |
| AFG1    | Cattle feed  | 100 | 7                        | 2.9          | 3.4             | Spain                 | 2019-2020             | [35] |
|         | Pig feed     | 100 | 10                       | 4.1          | 6               |                       |                       |      |
|         | Poultry feed | 100 | 7                        | 4.3          | 5.6             |                       |                       |      |
|         | Sheep feed   | 100 | 10                       | 4.3          | 6.5             |                       |                       |      |
| AFG2    | Cattle feed  | 100 | 9                        | 1.7          | 3.3             | Spain                 | 2019-2020             | [35] |
|         | Pig feed     | 100 | 17                       | 1.9          | 4.4             |                       |                       |      |
|         | Poultry feed | 100 | 14                       | 2.0          | 3.9             |                       |                       |      |
|         | Sheep feed   | 100 | 16                       | 1.9          | 4               |                       |                       |      |

**Table S2:** Raw data obtained from the bibliographic search (2019-2023) (Continuation)

| Analyte   | Matrix       | n   | % Positive sample (>LOQ) | Mean (µg/kg) | Maximum (µg/kg) | Origen of the samples | Collection of samples | Ref. |
|-----------|--------------|-----|--------------------------|--------------|-----------------|-----------------------|-----------------------|------|
| DON       | Cattle feed  | 100 | 76                       | 177.8        | 574             | Spain                 | 2019-2020             | [35] |
|           | Pig feed     | 100 | 72                       | 157.5        | 410             |                       |                       |      |
|           | Poultry feed | 100 | 71                       | 255.3        | 755             |                       |                       |      |
|           | Sheep feed   | 100 | 72                       | 238.3        | 887             |                       |                       |      |
| ZEA       | Cattle feed  | 100 | 49                       | 133.4        | 413             | Spain                 | 2019-2020             | [35] |
|           | Pig feed     | 100 | 50                       | 162.3        | 816             |                       |                       |      |
|           | Poultry feed | 100 | 66                       | 150.0        | 489             |                       |                       |      |
|           | Sheep feed   | 100 | 52                       | 201.3        | 658             |                       |                       |      |
| OTA       | Cattle feed  | 100 | 6                        | 6.3          | 7.7             | Spain                 | 2019-2020             | [35] |
|           | Pig feed     | 100 | 7                        | 22.9         | 65.5            |                       |                       |      |
|           | Poultry feed | 100 | 5                        | 18.1         | 23.2            |                       |                       |      |
|           | Sheep feed   | 100 | 8                        | 21.3         | 45.3            |                       |                       |      |
| STER      | Cattle feed  | 100 | 6                        | 3.3          | 4.7             | Spain                 | 2019-2020             | [35] |
|           | Pig feed     | 100 | 10                       | 3.6          | 6.1             |                       |                       |      |
|           | Poultry feed | 100 | 7                        | 3.4          | 5.1             |                       |                       |      |
|           | Sheep feed   | 100 | 5                        | 3.7          | 5.6             |                       |                       |      |
| Total AFs |              |     | n.i.                     | 4.2          | 5.1             | Jordan                | 2018                  | [12] |
| DON       |              |     | n.i.                     | 49.5         | 2490            |                       |                       |      |
| ZEA       | Cattle feed  | 88  | n.i.                     | 80.2         | 333.5           |                       |                       |      |
| Total FBs |              |     | n.i.                     | 5537         | 11638.2         |                       |                       |      |
| T-2       |              |     | n.i.                     | 266          | 1734.6          |                       |                       |      |
| Total AFs | Poultry feed | 27  | 93.0.                    | 17.2         | 89.0            | Kenya                 | 2019                  | [14] |
| AFB1      | Cattle feed  | 16  | 94                       | 31.2         | 134             | Kenya                 | 2019                  | [14] |
|           | Poultry feed | 27  | 93                       | 10.2         | 38.8            |                       |                       |      |
| AFB2      | Cattle feed  | 16  | 81                       | 5.1          | 22.1            | Kenya                 | 2019                  | [14] |
|           | Poultry feed | 27  | 48                       | 1.7          | 4.4             |                       |                       |      |

**Table S2:** Raw data obtained from the bibliographic search (2019-2023) (Continuation)

| Analyte   | Matrix       | n  | % Positive sample (>LOQ) | Mean (µg/kg) | Maximum (µg/kg) | Origen of the samples | Collection of samples | Ref. |
|-----------|--------------|----|--------------------------|--------------|-----------------|-----------------------|-----------------------|------|
| AFG1      | Cattle feed  | 16 | 88                       | 21.7         | 123             | Kenya                 | 2019                  | [14] |
|           | Poultry feed | 27 | 70                       | 6.7          | 41.7            |                       |                       |      |
| AFG2      | Cattle feed  | 16 | 44                       | 8.8          | 28.5            | Kenya                 | 2019                  | [14] |
|           | Poultry feed | 27 | 33                       | 2.5          | 6.4             |                       |                       |      |
| DON       | Cattle feed  | 16 | 94                       | 359.4        | 567             | Kenya                 | 2019                  | [14] |
|           | Poultry feed | 27 | 100                      | 329.1        | 1037            |                       |                       |      |
| DON-3gluc | Cattle feed  | 16 | 88                       | 22.1         | 61.7            | Kenya                 | 2019                  | [14] |
|           | Poultry feed | 27 | 100                      | 16.4         | 45.7            |                       |                       |      |
| ZEA       | Cattle feed  | 16 | 100                      | 35.2         | 140.2           | Kenya                 | 2019                  | [14] |
|           | Poultry feed | 27 | 100                      | 103.4        | 873.4           |                       |                       |      |
| OTA       | Cattle feed  | 16 | 56                       | 5.6          | 24.3            | Kenya                 | 2019                  | [14] |
|           | Poultry feed | 27 | 19                       | 4.8          | 10.6            |                       |                       |      |
| Total FBs | Cattle feed  | 16 | 100                      | 652.4        | 2171.3          | Kenya                 | 2019                  | [14] |
|           | Poultry feed | 27 | 100                      | 597.9        | 2684.8          |                       |                       |      |
| FB1       | Cattle feed  | 16 | 100                      | 487.9        | 1494            | Kenya                 | 2019                  | [14] |
|           | Poultry feed | 27 | 100                      | 431.4        | 1926            |                       |                       |      |
| FB2       | Cattle feed  | 16 | 94                       | 175.5        | 677.3           | Kenya                 | 2019                  | [14] |
|           | Poultry feed | 27 | 96                       | 172.9        | 728.8           |                       |                       |      |
| FB3       | Cattle feed  | 16 | 63                       | 79.8         | 124.3           | Kenya                 | 2019                  | [14] |
|           | Poultry feed | 27 | 85                       | 70.8         | 243             |                       |                       |      |
| FB4       | Cattle feed  | 16 | 75                       | 54.2         | 124.8           | Kenya                 | 2019                  | [14] |
|           | Poultry feed | 27 | 89                       | 73.7         | 387.8           |                       |                       |      |
| FA1       | Cattle feed  | 16 | 38                       | 39           | 83.2            | Kenya                 | 2019                  | [14] |
|           | Poultry feed | 27 | 52                       | 14.2         | 29.2            |                       |                       |      |
| FA2       | Cattle feed  | 16 | 75                       | 31.9         | 87.2            | Kenya                 | 2019                  | [14] |
|           | Poultry feed | 27 | 74                       | 24.5         | 103.1           |                       |                       |      |

**Table S2:** Raw data obtained from the bibliographic search (2019-2023) (Continuation)

| Analyte   | Matrix       | n   | % Positive sample (>LOQ) | Mean (µg/kg) | Maximum (µg/kg) | Origen of the samples | Collection of samples | Ref. |
|-----------|--------------|-----|--------------------------|--------------|-----------------|-----------------------|-----------------------|------|
| T-2       | Cattle feed  | 16  | 13                       | 3.5          | 4.4             | Kenya                 | 2019                  | [14] |
|           | Poultry feed | 27  | 4                        | 5.2          | 5.2             |                       |                       |      |
| HT-2      | Cattle feed  | 16  | 6                        | 11.9         | 11.9            | Kenya                 | 2019                  | [14] |
|           | Poultry feed | 27  | 4                        | 13.8         | 13.8            |                       |                       |      |
| NIV       | Cattle feed  | 16  | 94                       | 51.1         | 102.1           | Kenya                 | 2019                  | [14] |
|           | Poultry feed | 27  | 96                       | 43.2         | 105.5           |                       |                       |      |
| ERGOT     | Cattle feed  | 16  | 63                       | 56.9         | 285.7           | Kenya                 | 2019                  | [14] |
|           | Poultry feed | 27  | 81                       | 26           | 113.2           |                       |                       |      |
| Total AFs | Cattle feed  | 189 | 59.0                     | 40.2         | 406.1           | India                 | 2017-2018             | [19] |
| AFB1      |              |     | 59                       | 35.6         | 374.6           |                       |                       |      |
| AFB2      |              |     | 59                       | 3.9          | 31.5            |                       |                       |      |
| AFG1      |              |     | 11                       | 0.3          | 3.9             |                       |                       |      |
| AFG2      |              |     | 5                        | n.i.         | n.i.            |                       |                       |      |
| Total AFs | Poultry feed | 27  | 7.4                      | 0.39         | 0.63            | Malaysia              | 2017-2018             | [22] |
| AFB1      |              |     | n.i.                     | n.i.         | n.i.            |                       |                       |      |
| AFB2      |              |     | n.i.                     | n.i.         | n.i.            |                       |                       |      |
| AFG1      |              |     | n.i.                     | n.i.         | n.i.            |                       |                       |      |
| AFG2      |              |     | n.i.                     | n.i.         | n.i.            |                       |                       |      |
| Total AFs | Poultry feed | 40  | 97.5                     | 48.6         | 86.2            | Pakistan              | 2018                  | [26] |
| Total AFs | Poultry feed | 33  | 94                       | 190.2        | 1919.8          | Ethiopia              | 2018-2019             | [27] |
| AFB1      |              |     | n.i.                     | 70.11        | 633.94          |                       |                       |      |
| AFB2      |              |     | n.i.                     | 13.50        | 142.98          |                       |                       |      |
| AFG1      |              |     | n.i.                     | 88.55        | 921.43          |                       |                       |      |
| AFG2      |              |     | n.i.                     | 18.00        | 221.43          |                       |                       |      |
| Total AFs | Cattle feed  | 293 | 2.4                      | <5           | >20             | Italy                 | 2013-2021             | [28] |

0 **Table S3.** Analytical methods employed for the analysis of mycotoxin biomarkers in animal biological fluids.

| Animal                               | Matrix          | Analyte/s                                                                                                                 | LOD<br>(ng/g or<br>ng/mL) | LOQ<br>(ng/g or<br>ng/mL) | Sample preparation                                                                                                                                                                                                                                                                                                                                                                                                                                                  | Separation and detection<br>Technique                                                                                                                                                                                                                                                                   | Year | Ref. |
|--------------------------------------|-----------------|---------------------------------------------------------------------------------------------------------------------------|---------------------------|---------------------------|---------------------------------------------------------------------------------------------------------------------------------------------------------------------------------------------------------------------------------------------------------------------------------------------------------------------------------------------------------------------------------------------------------------------------------------------------------------------|---------------------------------------------------------------------------------------------------------------------------------------------------------------------------------------------------------------------------------------------------------------------------------------------------------|------|------|
| Pig                                  | Plasma<br>Urine | OTA, OT $\alpha$                                                                                                          | 1.5                       | 5                         | <b>LLE</b><br>Normalize direct urine with 10 $\mu$ M creatinine.<br>200 $\mu$ L urine or plasma + 8 $\mu$ L (1 $\mu$ g/mL <sup>13</sup> C-OTA and <sup>13</sup> C-OT $\alpha$ ) + 800 $\mu$ L EtOAc/phosphoric acid 85% (99/1, v/v).<br>Centrifuge + 50 $\mu$ L supernatant + 50 $\mu$ L ACN                                                                                                                                                                        | <b>LC-MS/MS</b><br>Column: C18 (150 mm x 2.1 mm<br>x 2.6 $\mu$ m) at 40°C<br>Flow: 0.4 mL/min<br>MP: (A) H <sub>2</sub> O/ACN (95/5 v/v)<br>(0.1 FA); (B) ACN/H <sub>2</sub> O (95/5,<br>v/v) (0.1% FA) in gradient<br>conditions<br>Detector: ESI (-), QTrap, MRM                                      | 2023 | [37] |
|                                      | Feces           | OTA, OT $\alpha$                                                                                                          | 3.0                       | 10                        | 1 g + 30 $\mu$ L <sup>13</sup> C-OTA and <sup>13</sup> C-OT $\alpha$ (1 $\mu$ g/mL) + 6 mL<br>phosphoric acid, 1M + 30 mL EtOAc. Extract 60 min at 80<br>rpm. Centrifuge. 3 mL water phase + 70 $\mu$ L<br>orthophosphoric acid 85% + 1.5 mL EtOAc. Mix at 80<br>rpm. Centrifuge. 50 $\mu$ L supernatant + 50 $\mu$ L ACN                                                                                                                                           |                                                                                                                                                                                                                                                                                                         |      |      |
| Pig,<br>poultry,<br>cattle,<br>sheep | Plasma          | AFB1, OTA, ZEN, DON,<br>3/15-ADON, DOM-1, T-<br>1, HT-2, AFM1, STER,<br>NEO, DAS, FUS-X,<br>AFB2, AFG1, AFG2,<br>OTB, NIV | 0.04-9.10                 | 0.2-20.4                  | <b>SPE Captiva</b><br>400 $\mu$ L plasma + SEP Captiva + 1.2 mL ACN (1% FA).<br>Elute and evaporate. Group I: 400 $\mu$ L, evaporate + 200 $\mu$ L<br>MF: 60A/40B% (A: 5mM ammonium formate, 0.1% FA in<br>water; B: 5mM ammonium formate, 0.1% FA in a 95.5<br>MeOH/H <sub>2</sub> O). Group II: 400 $\mu$ L + evaporate + 200 MF:<br>95A/5B%.<br>450 $\mu$ L plasma + 50 $\mu$ L $\beta$ -glucuronidase-arylsulfatase +<br>above described SPE Captiva extraction | <b>LC-MS/MS</b><br>Column: C18 (150 mm x 2.1 mm<br>x 2.7 $\mu$ m) at 45°C<br>Flow: 0.4 mL/min<br>MP: (A) 5 mM ammonium<br>formate, 0.1% FA in H <sub>2</sub> O; (B) 5<br>mM ammonium formate, 0.1%<br>FA in a 95.5 MeOH/H <sub>2</sub> O, v/v) in<br>gradient conditions<br>Detector: ESI (+), QqQ, MRM | 2023 | [38] |
|                                      |                 |                                                                                                                           |                           |                           | <b>SPE</b><br>100 $\mu$ L plasma + 25 $\mu$ L IS + 100 $\mu$ L ACN + 300 $\mu$ L 1% FA<br>in ACN + centrifuge + Oasis® Ostro-96-well plate.<br>Evaporate (N <sub>2</sub> ) and reconstitute in 200 $\mu$ L of H <sub>2</sub> O/MeOH<br>(50/50, v/v)                                                                                                                                                                                                                 | <b>LC-MS/MS</b><br>Column: C18 (100 mm x 2.1 mm<br>x 1.8 $\mu$ m) at 40°C<br>Flow: 0.3 mL/min<br>MP: (A) H <sub>2</sub> O; (B) MeOH, in<br>gradient conditions<br>Detector: ESI (+), QqQ, MRM                                                                                                           |      |      |
| Poultry<br>and cattle                | Plasma          | AFB1, AFB2, AFG1,<br>AFG2                                                                                                 | 0.003-0.03                | 0.05-0.1                  |                                                                                                                                                                                                                                                                                                                                                                                                                                                                     |                                                                                                                                                                                                                                                                                                         | 2023 | [39] |

**Table S3.** Analytical methods employed for the analysis of mycotoxin biomarkers in animal biological fluids (continuation)

| Animal             | Matrix                                                                                 | Analyte/s                                                | LOD<br>(ng/g or<br>ng/mL)  | LOQ<br>(ng/g or<br>ng/mL) | Sample preparation                                                                                                                                                                                                                                                                                                                                                                                                                                                                                                                              | Separation and detection<br>Technique                                                                                                                                                                                                                      | Year | Ref. |
|--------------------|----------------------------------------------------------------------------------------|----------------------------------------------------------|----------------------------|---------------------------|-------------------------------------------------------------------------------------------------------------------------------------------------------------------------------------------------------------------------------------------------------------------------------------------------------------------------------------------------------------------------------------------------------------------------------------------------------------------------------------------------------------------------------------------------|------------------------------------------------------------------------------------------------------------------------------------------------------------------------------------------------------------------------------------------------------------|------|------|
| Pig                | Serum<br>Urine                                                                         | DON, DOM-1, iso-DON,<br>3/15-ADON, 3/15-<br>ADOM, isoDOM | n.i.                       | n.i.                      | <b>LLE</b><br>50 µL serum + 35 µL β-glucuronidase-arylsulfatase (18 h.<br>37°) + 300 µL MeOH/AA (99.8/0.2, v/v)<br>Urine samples: Direct injection                                                                                                                                                                                                                                                                                                                                                                                              | <b>LC-MS/MS</b><br>Column: C18 (150 mm x 2.1 mm<br>x 2.6 µm) at 30°C<br>Flow: 0.25 mL/min<br>MP: (A) H <sub>2</sub> O/AA (99.9/0.1, v/v);<br>(B) ACN/AA (99.9/0.1, v/v ), in<br>gradient conditions<br>Detector: ESI (-), QTrap, SRM                       | 2023 | [40] |
| Pig and<br>poultry | Feces/ excreta<br><br>Liver, Kidney,<br>Muscle, Skin and<br>Fat<br><br>Urine<br>Plasma | OTA, OTα<br><br>OTA, OTα<br><br>OTA, OTα                 | 3.0<br><br>0.15<br><br>1.5 | 10<br><br>0.5<br><br>5    | <b>LLE</b><br>1 g + 30 µL <sup>13</sup> C-OTA and <sup>13</sup> C-OTα (1µg/mL) + 6 mL<br>phosphoric acid, 1M + 30 mL EtOAc. Extract 60 min at 80<br>rpm. Centrifuge. 3 mL water phase + 70 µL<br>orthophosphoric acid 85% + 1.5 mL EtOAc. Mix at 80<br>rpm. Centrifuge. 50 µL supernatant + 50 µL ACN<br><br>Dilute urine sample to 10 µM creatinine. 200 µL + 8 µL<br>(1µg/mL <sup>13</sup> C-OTA and <sup>13</sup> C-OTα ) + 800 µL EtOAc<br>/phosphoric acid 85% (99/1, v/v). Centrifuge. Centrifuge.<br>50 µL supernatant + 50 µL ACN       | <b>LC-MS/MS</b><br>Column: C18 (150 mm x 2.1 mm<br>x 2.6µm) at 40°C<br>Flow: 0.4 mL/min<br>MP: (A) H <sub>2</sub> O/ACN (95/5 v/v)<br>(0.1 FA); (B) ACN/H <sub>2</sub> O (95/5<br>v/v) (0.1 FA) in gradient<br>conditions<br>Detector: ESI (-), QTrap, MRM | 2022 | [41] |
| Poultry            | Excreta                                                                                | FB1, FB2, FB3<br>HFB1, HFB2, HFB3                        | 50                         | 160                       | <b>LLE and SPE (two methods)</b><br>5 g + 20 mL ACN/H <sub>2</sub> O/FA (74:25:1). Shake, ultrasonicate<br>and centrifuge. 50 µL supernatant + 950 µL destiled<br>water. A) 50 µL + 10 µL 13-C-FBs IS solution + 850 µL<br>0.2% FA in MeOH/H <sub>2</sub> O (1:9)<br>B) hydrolysis: 50 µL + 10 µL 13-C-FBs IS solution + 850 µL<br>2.5M NaOH (2 h. at 70°C) + Oasis MAX. Wash (3mL of<br>2% ammonium hydroxide) and eluted (3 mL 2% FA in<br>MeOH). Evaporate (N <sub>2</sub> ) and reconstitute with 0.2% FA in<br>MeOH/H <sub>2</sub> O (1:9) | <b>LC-MS/MS</b><br>Column: C18 (100 mm x 2.1 mm<br>x 1.6 µm) at 40°C<br>Flow: 0.4 mL/min<br>MP: (A) H <sub>2</sub> O; (B) MeOH both<br>with 0.2% FA, in gradient<br>conditions<br>Detector: ESI (+), QqQ, MRM                                              | 2022 | [42] |

**Table S3.** Analytical methods employed for the analysis of mycotoxin biomarkers in animal biological fluids (continuation)

| Animal          | Matrix | Analyte/s                                                                                                                                                                                                                                      | LOD<br>(ng/g or<br>ng/mL) | LOQ<br>(ng/g or<br>ng/mL) | Sample preparation                                                                                                                                                                                                                                                                                                                                                                                | Separation and detection<br>Technique                                                                                                                                                                                                                                | Year | Ref.    |
|-----------------|--------|------------------------------------------------------------------------------------------------------------------------------------------------------------------------------------------------------------------------------------------------|---------------------------|---------------------------|---------------------------------------------------------------------------------------------------------------------------------------------------------------------------------------------------------------------------------------------------------------------------------------------------------------------------------------------------------------------------------------------------|----------------------------------------------------------------------------------------------------------------------------------------------------------------------------------------------------------------------------------------------------------------------|------|---------|
| Pig             | Urine  | DON, 3-ADON, 15-ADON, DOM-1, ZEA, $\alpha$ -ZEL, $\beta$ -ZEL, $\alpha$ -ZAL, $\beta$ -ZAL, ZAN, OTA, AFB1, AFB2, AFG1, AFM1, T-2, HT-2, NIV, TEN, AOH, AME, ATX-I, CIT, DAS, FUS-X, STER, T-2 triol, OT $\alpha$ , HFB1, DH-CIT, ENNs and BEA | 0.03-2                    | 0.1-8                     | <b>LLE</b><br>Normalize direct urine with creatinine.<br>(A) 250 $\mu$ L urine + 1 g NaCl + 500 $\mu$ L EtOAc. Centrifuge. Evaporate (N <sub>2</sub> ) and reconstitute with 50% FM A and B<br>(B) 250 $\mu$ L urine + $\beta$ -glucuronidase (2 h, 40°C)                                                                                                                                         | <b>LC-MS/MS</b><br>Column: C18 (150 mm x 2 mm x 3 $\mu$ m) at 35°C<br>Flow: 0.45 mL/min<br>MP: (A) 95% MeOH/5% 10 mM ammonium acetate, 0.001% AA;<br>(B) 5% MeOH/95% 10 mM ammonium acetate, 0.001% AA in gradient conditions<br>Detector: ESI ( $\pm$ ), QTrap, MRM | 2021 | [43]    |
| Pig             | Plasma | DON, DOM1, ZEA, $\alpha$ -ZEL, OTA, OT $\alpha$ , CIT, DH-CIT                                                                                                                                                                                  | n.i.                      | n.i.                      | <b>LLE</b><br>250 $\mu$ L serum + 750 $\mu$ L ACN (0.1% FA). Centrifuge. 800 $\mu$ L supernatant + 10 $\mu$ L IS. Evaporate (N <sub>2</sub> ) and reconstitute with 100 $\mu$ L FM (50% eluent A and B)                                                                                                                                                                                           | <b>LC-MS/MS</b><br>Column: C18 (150 mm x 2 mm x 3 $\mu$ m) at 35°C<br>Flow: 0.4 mL/min<br>MP: (A) H <sub>2</sub> O/5 mM ammonium acetate, 0.05% AA;<br>(B) MeOH/5 mM ammonium acetate, 0.05% AA in gradient conditions<br>Detector: ESI (-), QqQ, MRM                | 2021 | [44]    |
|                 | Urine  | DON, DOM1, ZEA, $\alpha$ -ZEL, OTA, OT $\alpha$ , CIT, DH-CIT                                                                                                                                                                                  | 0.03-2                    | 0.1-8                     | Normalize direct urine with creatinine.<br>250 $\mu$ L urine + 1 g NaCl + 500 $\mu$ L EtOAc. Centrifuge. Evaporate (N <sub>2</sub> ) and reconstitute with 50% FM A and B                                                                                                                                                                                                                         |                                                                                                                                                                                                                                                                      |      |         |
| Pig and poultry | Plasma | CIT<br>DH-CIT                                                                                                                                                                                                                                  | 0.05<br>0.01              | 0.1<br>0.1                | <b>LLE and SPE</b><br>(A) 250 $\mu$ L pig plasma + 750 $\mu$ L ACN. Centrifuge. Evaporate supernatant (N <sub>2</sub> ) and reconstitute with 250 $\mu$ L H <sub>2</sub> O/MeOH (50/50, v/v)<br>(B) 100 $\mu$ L poultry plasma + Oasis® Ostro 96-well plate + 300 $\mu$ L ACN/FA (99.9/0.1, v/v). Evaporate (N <sub>2</sub> ) and reconstitute with 100 $\mu$ L H <sub>2</sub> O/MeOH; 50/50, v/v | <b>LC-MS/MS</b><br>Column: C18 (100 mm x 2.1 mm x 1.8 $\mu$ m) at 40°C<br>Flow: 0.4 mL/min<br>MP: (A) H <sub>2</sub> O ; (B) MeOH both with 0.2% FA, in gradient conditions<br>Detector: ESI (+), QqQ, MRM                                                           | 2020 | [45,46] |

**Table S3.** Analytical methods employed for the analysis of mycotoxin biomarkers in animal biological fluids (continuation)

| Animal  | Matrix                   | Analyte/s                                                                                                                                                   | LOD<br>(ng/g or<br>ng/mL) | LOQ<br>(ng/g or<br>ng/mL) | Sample preparation                                                                                                                                                                                                                                                                                                                                                                                                                                                                                                                                        | Separation and detection<br>Technique                                                                                                                                                                                                 | Year | Ref. |
|---------|--------------------------|-------------------------------------------------------------------------------------------------------------------------------------------------------------|---------------------------|---------------------------|-----------------------------------------------------------------------------------------------------------------------------------------------------------------------------------------------------------------------------------------------------------------------------------------------------------------------------------------------------------------------------------------------------------------------------------------------------------------------------------------------------------------------------------------------------------|---------------------------------------------------------------------------------------------------------------------------------------------------------------------------------------------------------------------------------------|------|------|
| Poultry | Plasma                   | FB1<br>HFB1                                                                                                                                                 | 0.15<br>0.17              | 1<br>2.5                  | SPE<br>100 µL plasma + Oasis® Ostro 96-well plate + 300 µL<br>ACN/1% FA                                                                                                                                                                                                                                                                                                                                                                                                                                                                                   | LC-MS/MS<br>Column: C18 (100 mm x 2.1 mm<br>x 1.8 µm) at 40°C<br>Flow: 0.4 mL/min<br>MP: (A) H <sub>2</sub> O/10 mM<br>ammonium formate, 0.3% FA;<br>(B) ACN, in gradient conditions<br>Detector: ESI (+), QqQ, MRM M                 | 2020 | [47] |
| Pig     | Plasma<br>Feces<br>Urine | ZEN, α-ZEL, β-ZEL, α-<br>ZAL, β-ZAL, ZAN, TEA,<br>AOH, AME, DON,<br>DOM-1, 3/15 ADON, T2,<br>HT2, T2G, AFB1, AFM1,<br>OTA, ENNA1, ENNA,<br>ENNB, ENNB1, BEA | n.i                       | 1.0-5.0                   | LLE and SPE<br>(A) Plasma: 250 µL + 750 µL ACN. Centrifuge.<br>Evaporate supernatant (N <sub>2</sub> ) and reconstitute<br>with 250 µL MeOH/H <sub>2</sub> O (85/15, v/v)<br>(B) Feces: a) 250 mg + 5 mL MeOH/EtOAc/FA<br>(75:24:1), shake, centrifuge (OTA, TeA, AME<br>and AOH); b) 250 mg + 5 mL Acetone, shake,<br>centrifuge + HybridSPE-phospholipid cartridge<br>(other mycotoxins)<br>Urine: 500 µL (at pH 2 and 8) + 300 µL EtOAc. Centrifuge.<br>Evaporate (N <sub>2</sub> ) and reconstitute with 250 µL MeOH/H <sub>2</sub> O<br>(85/15, v/v) | LC-MS/MS<br>Column: C18 (100 mm x 2.1 mm<br>x 1.8 µm) at 45°C<br>Flow: 0.3 mL/min<br>MP: (A) H <sub>2</sub> O ; (B) MeOH both<br>with 10 mM ammonium<br>formate and 0.3% FA, in<br>gradient conditions<br>Detector: ESI (+), QqQ, SRM | 2019 | [48] |
| Poultry | Plasma<br>Excreta        | ZEN, α-ZEL, β-ZEL, α-<br>ZAL, β-ZAL, ZAN, TEA,<br>AOH, AME, DON,<br>DOM-1, 3/15 ADON, T2,<br>HT2, T2G, AFB1, AFM1,<br>OTA, ENNA1, ENNA,<br>ENNB, ENNB1, BEA | n.i.                      | 1.0-10                    | LLE and SPE<br>(A) Plasma: 150 µL + Oasis® Ostro 96-well plate +<br>450 µL ACN/1%. Evaporate (N <sub>2</sub> ). Reconstitute<br>with 150 µL MeOH/H <sub>2</sub> O (85/15, v/v)<br>(C) Excreta: 250 mg + 1.5 mL ACN, shake and<br>centrifuge. Evaporate (N <sub>2</sub> ) and reconstitute<br>with 250 µL MeOH/H <sub>2</sub> O (85/15, v/v)                                                                                                                                                                                                               | LC-MS/MS<br>Column: C18 (100 mm x 2.1 mm<br>x 1.8 µm) at 45°C<br>Flow: 0.3 mL/min<br>MP: (A) H <sub>2</sub> O ; (B) MeOH both<br>with 10 mM ammonium<br>formate and 0.3% FA, in<br>gradient conditions<br>Detector: ESI (+), QqQ, SRM | 2019 | [48] |



**Table S3.** Analytical methods employed for the analysis of mycotoxin biomarkers in animal biological fluids (continuation)

| Animal             | Matrix                           | Analyte/s                                                                                                                                                      | LOD<br>(ng/g or<br>ng/mL) | LOQ<br>(ng/g or<br>ng/mL) | Sample preparation                                                                                                                                                         | Separation and detection<br>Technique                                                                                                                                                                         | Year | Ref. |
|--------------------|----------------------------------|----------------------------------------------------------------------------------------------------------------------------------------------------------------|---------------------------|---------------------------|----------------------------------------------------------------------------------------------------------------------------------------------------------------------------|---------------------------------------------------------------------------------------------------------------------------------------------------------------------------------------------------------------|------|------|
| Pig and<br>poultry | Plasma<br>Feces/excreta<br>Urine | AFB1, DON, DON-s,<br>DON-GlcA, ZEA, ZEA-<br>GlcA,                                                                                                              | 0.001-1.68                | 1.0-5.0                   | <b>LLE and SPE</b>                                                                                                                                                         | <b>LC-MS/MS</b>                                                                                                                                                                                               | 2019 | [49] |
|                    |                                  |                                                                                                                                                                |                           |                           | (A) Poultry plasma: 150 µL + Oasis® Ostro 96-well plate + 450 µL ACN/1%. Evaporate(N <sub>2</sub> ) and reconstitute with 150 µL MeOH/H <sub>2</sub> O (85/15, v/v)        | Column: C18 (100 mm x 2.1 mm x 1.8 µm) at 45°C<br>Flow: 0.3 mL/min<br>MP: (A) H <sub>2</sub> O ; (B) MeOH both with 10 mM ammonium formate and 0.3% FA, in gradient conditions<br>Detector: ESI (+), QqQ, SRM |      |      |
|                    |                                  |                                                                                                                                                                |                           |                           | (B) Pig plasma: 250 µL + 750 µL ACN. Centrifuge. Evaporate supernatant (N <sub>2</sub> ) and reconstitute with 250 µL MeOH/H <sub>2</sub> O (85/15, v/v)                   |                                                                                                                                                                                                               |      |      |
|                    |                                  |                                                                                                                                                                |                           |                           | (C) Feces: 250 mg + 20 µL IS. Centrifuge + HyBridSPE-phospholipid cartridge. Evaporate (N <sub>2</sub> ) and reconstitute with 250 µL MeOH/H <sub>2</sub> O (85/15, v/v)   |                                                                                                                                                                                                               |      |      |
| Pig and<br>poultry | Plasma<br>DBS                    | DON, DOM1,<br>3/15ADON, AFB1,<br>AFM1, ENNA, ENNA1,<br>ENNB, ENNB1, BEA,<br>FB1, FB2, OTA, ZEA, α-<br>ZEL, β-ZEL, α-ZAL, β-<br>ZAL, ZAN, TEA, AOH,<br>AME, T-2 | 0.001-0.74                | 0.5-10                    | <b>LLE and SPE</b>                                                                                                                                                         | <b>LC-MS/MS</b>                                                                                                                                                                                               | 2019 | [50] |
|                    |                                  |                                                                                                                                                                |                           |                           | (A) 60 µL blood + H <sub>2</sub> O/ACN/acetone (30/35/35, v/v/v). Dried paper (N <sub>2</sub> ) and reconstitute with 60 µL H <sub>2</sub> O/MeOH/FA (60/39.9/0.1, v/v/v). | Column: C18 (100 mm x 2.1 mm x 1.8 µm) at 45°C<br>Flow: 0.3 mL/min<br>MP: (A) H <sub>2</sub> O ; (B) MeOH both with 10mM ammonium formate and 0.3% FA, in gradient conditions<br>Detector: ESI (+), QqQ, SRM  |      |      |
|                    |                                  |                                                                                                                                                                |                           |                           | (B) Poultry plasma: 150 µL + Oasis® Ostro 96-well plate + 450 µL ACN/1%. Evaporate(N <sub>2</sub> ) and reconstitute with 150 µL MeOH/H <sub>2</sub> O (85/15, v/v)        |                                                                                                                                                                                                               |      |      |
|                    |                                  |                                                                                                                                                                |                           |                           | (D) Pig plasma: 250 µL + 750 µL ACN. Centrifuge. Evaporate supernatant (N <sub>2</sub> ) and reconstitute with 250 µL MeOH/H <sub>2</sub> O (85/15, v/v)                   |                                                                                                                                                                                                               |      |      |

**Table S3.** Analytical methods employed for the analysis of mycotoxin biomarkers in animal biological fluids (continuation)

| Animal  | Matrix                             | Analyte/s                                                                               | LOD<br>(ng/g or<br>ng/mL) | LOQ<br>(ng/g or<br>ng/mL) | Sample preparation                                                                                                                                                                                                                                                                               | Separation and detection<br>Technique                                                                                                                                                                                                                                               | Year | Ref. |
|---------|------------------------------------|-----------------------------------------------------------------------------------------|---------------------------|---------------------------|--------------------------------------------------------------------------------------------------------------------------------------------------------------------------------------------------------------------------------------------------------------------------------------------------|-------------------------------------------------------------------------------------------------------------------------------------------------------------------------------------------------------------------------------------------------------------------------------------|------|------|
| Pig     | Plasma                             | ZEA, $\alpha,\beta$ -ZEL, $\alpha,\beta$ -ZAL,<br>ZAN, ZEN14G, ZEN14S                   | 0.02-0.2                  | 0.04-0.41                 | <b>LLE</b><br>250 $\mu$ L plasma + 1000 $\mu$ L ACN. Centrifuge.<br>Evaporate supernatant (N <sub>2</sub> ) and reconstitute with<br>250 $\mu$ L H <sub>2</sub> O/MeOH (85/15, v/v)<br>(C)                                                                                                       | <b>LC-MS/MS</b><br>Column: C18 (100 mm x 2.1 mm<br>x 1.8 $\mu$ m) at 45°C<br>MP: (A) H <sub>2</sub> O/0.01% AA ; (B)<br>ACN, in gradient conditions<br>Detector: ESI (-), QqQ, SRM                                                                                                  | 2019 | [51] |
| Pig     | Plasma                             | ZEA-14GlcA, $\alpha,\beta$ -ZEL-<br>14GlcA, $\alpha$ -ZEL-7GlcA,<br>$\beta$ -ZEL-16GlcA | 1.1-3.1                   | 3.7-10.2                  | <b>LLE</b><br>150 $\mu$ L plasma + 450 $\mu$ L ACN. Centrifuge. Evaporate<br>supernatant (N <sub>2</sub> ) and reconstitute with 100 $\mu$ L<br>ACN/H <sub>2</sub> O (50/50, v/v)                                                                                                                | <b>LC-HRMS</b><br>Column: C18 (100 mm x 2.1 mm<br>x 2.6 $\mu$ m) at 45°C<br>MP: (A) H <sub>2</sub> O/0.2% FA ; (B)<br>ACN/0.2%FA, in gradient<br>conditions<br>Detector: ESI (-), QOrbitrap                                                                                         | 2019 | [51] |
| Pig     | Urine                              | DON, DOM-1, ZEA, $\alpha$ -<br>ZEL, $\beta$ -ZEL, FB1, OTA,<br>AFM1                     | 0.006-0.36                | 0.02-1.21                 | <b>IAC</b><br>5 mL urine + $\beta$ -glucuronidase/sulfatase + water (1:1, v/v)<br>+ Myco6in1+TM multi-antibody IAC and OASIS<br>HLB® column in tandem. Dry and reconstitute with<br>200 $\mu$ L of MP (MeOH/H <sub>2</sub> O, 20/80, v/v)                                                        | <b>LC-MS/MS</b><br>Column: C18 (100 mm x 2.1 mm<br>x 1.7 $\mu$ m) at 40°C<br>Flow: 0.25 mL/min<br>MP: (A) MeOH/0.5% AA; (B)<br>H <sub>2</sub> O/0.5%AA, in gradient<br>conditions<br>Detector: ESI (-), QqQ, MRM                                                                    | 2019 | [52] |
| Poultry | Feces/excreta and<br>ileal content | AFB1, AF2, AFG1,<br>AFG2, AFM1, AFP1,<br>AFQ1, AFB1-N <sup>7</sup> -guanine             | 0.045-0.135               | 0.15-0.45                 | <b>LLE-SPE</b><br>1 g + AF standard mixture (to 10ng/g). 500 mg + 5 mL<br>ACN/H <sub>2</sub> O/AA (79:20:1) + rotary shaker (40 min) + SPE<br>cartridge (Stata C18-T). Elute with MeOH/H <sub>2</sub> O/AA.<br>Evaporate and reconstitute with 0.25 mL MeOH/H <sub>2</sub> O/AA<br>(50:49.9:0.1) | <b>LC-MS/MS</b><br>Column: C18 (15 mm x 3.1 mm<br>x 2.6 $\mu$ m)<br>Flow: 0.4 mL/min<br>MP: (A) H <sub>2</sub> O/AA (99.9/0.1); (B)<br>MeOH/H <sub>2</sub> O/AA(98/1.9/0.1,<br>v/v/v) both with 5 mM<br>ammonium acetate in gradient<br>conditions<br>Detector: ESI (+), QTrap, MRM | 2019 | [53] |

**Table S3.** Analytical methods employed for the analysis of mycotoxin biomarkers in animal biological fluids (continuation)

| Animal | Matrix                          | Analyte/s                                                              | LOD<br>(ng/g or<br>ng/mL) | LOQ<br>(ng/g or<br>ng/mL) | Sample preparation                                                                                                                                                                                                                                                                                           | Separation and detection<br>Technique                                                                                                                                                                  | Year | Ref. |
|--------|---------------------------------|------------------------------------------------------------------------|---------------------------|---------------------------|--------------------------------------------------------------------------------------------------------------------------------------------------------------------------------------------------------------------------------------------------------------------------------------------------------------|--------------------------------------------------------------------------------------------------------------------------------------------------------------------------------------------------------|------|------|
| Pig    | Heart, Liver,<br>Spleen, Muscle | ZEN, ZAN, $\beta$ -ZAL, $\alpha$ -<br>ZAL, $\beta$ -ZEL, $\alpha$ -ZEL | 0.5-1                     | 1-2                       | <b>QuEChERS</b><br>5 g + 5 mL H <sub>2</sub> O + 5 mL ACN/0.1% FA + 2 g of MgSO <sub>4</sub> and<br>0.5 g of NaCl + 50 mg C18 + 100 mg MgSO <sub>4</sub> . Shake and<br>centrifuge + evaporate (N <sub>2</sub> ) and reconstitute with 400 $\mu$ L<br>ACN/H <sub>2</sub> O (50/50, v/v) + 400 $\mu$ L hexane | <b>LC-MS/MS</b><br>Column: C18 (100 mm x 4.6 mm<br>x 3.5 $\mu$ m) at 30°C<br>Flow: 0.35 mL/min<br>MP: (A) 5 mM ammonium<br>acetate; (B) MeOH, in gradient<br>conditions<br>Detector: ESI (-), QqQ, SRM | 2018 | [54] |
| Goat   | Plasma<br>Feces<br>Urine        | FUS-X, NIV                                                             | 0.5-1                     | 1-2                       | <b>LLE-SPE</b><br>1 mL plasma or urine, or 5 g feces + 3 mL ACN/H <sub>2</sub> O (3/1)<br>+ ammonium sulfate. Shake and centrifuge + C18 Sep-pak<br>silica cartridge. Evaporate (N <sub>2</sub> ) and reconstitute with 500<br>$\mu$ L MeOH/H <sub>2</sub> O + 5mM ammonium acetate                          | <b>LC-MS/MS</b><br>Column: C18 (50 mm x 4.6 mm<br>x 1.8 $\mu$ m) at 40°C<br>Flow: 0.4 mL/min<br>MP: (A) 5 mM ammonium<br>acetate; (B) MeOH, in gradient<br>conditions<br>Detector: ESI (+), QqQ, SRM   | 2018 | [55] |
| Pig    | Plasma                          | FB1, FB2, FB3, pHFB1,<br>HFB1, pHFB2, HFB2,<br>FB3, pHFB3, HFB3        | 0.05-0.27                 | 0.15-0.8                  | <b>LLE</b><br>300 $\mu$ L plasma + 900 $\mu$ L MeOH/ACN (50/50, v/v).<br>Centrifuge. Reextract with 200 $\mu$ L ACN/H <sub>2</sub> O/FA<br>(50/49/1, v/v/v). Evaporate (N <sub>2</sub> ) and reconstitute<br>with 300 $\mu$ L ACN/H <sub>2</sub> O/FA (50/49/1, v/v/v)                                       | <b>LC-MS/MS</b><br>Column: C18 (150 mm x 3 mm<br>x 3 $\mu$ m) at 35°C<br>MP: (A) H <sub>2</sub> O/0.1% AA; (B)<br>ACN/0.1% AA, in gradient<br>conditions<br>Detector: ESI (-), QTrap, SRM              | 2018 | [56] |
|        | Feces                           |                                                                        | 10-217                    | 21-725                    | 1 g of homogenized feces samples + 10 or 5 mL of<br>ACN/H <sub>2</sub> O/FA (74/25/1, v/v/v). Shake. Centrifuge<br>and dilute with extraction solvent                                                                                                                                                        |                                                                                                                                                                                                        |      |      |
|        | Urine                           |                                                                        | 0.18-0.36                 | 0.6-4.5                   | 150 $\mu$ L aliquots of urine (diluted with water to 4 mM<br>creatinine content) + 10 $\mu$ L IS + 290 $\mu$ L MeOH/FA (99/1,<br>v/v). Shake and centrifuge                                                                                                                                                  |                                                                                                                                                                                                        |      |      |

**Table S3.** Analytical methods employed for the analysis of mycotoxin biomarkers in animal biological fluids (continuation)

| Animal  | Matrix                   | Analyte/s                                  | LOD<br>(ng/g or<br>ng/mL) | LOQ<br>(ng/g or<br>ng/mL) | Sample preparation                                                                                                                                                                                                                                                                                                                                                    | Separation and detection<br>Technique                                                                                                                                                               | Year | Ref. |
|---------|--------------------------|--------------------------------------------|---------------------------|---------------------------|-----------------------------------------------------------------------------------------------------------------------------------------------------------------------------------------------------------------------------------------------------------------------------------------------------------------------------------------------------------------------|-----------------------------------------------------------------------------------------------------------------------------------------------------------------------------------------------------|------|------|
| Poultry | Plasma                   | FB1, pHFB1,<br>HFB1, FB2                   | 0.03-0.17                 | 0.72-2.5                  | <b>SPE</b><br>100 µL plasma + Oasis® Ostro 96-well plate + 300 µL<br>ACN/1% FA                                                                                                                                                                                                                                                                                        | <b>LC-MS/MS</b><br>Column: C18 (100 mm x 2.1 mm<br>x 1.8 µm)<br>MP: (A) H <sub>2</sub> O/10 mM<br>ammonium formate, 0.3% FA;<br>(B) ACN, in gradient conditions<br>Detector: ESI (+), QqQ, MRM      | 2018 | [57] |
| Poultry | Liver and<br>gizzards    | AFB1                                       | 0.02-0.05                 | 0.08-0.15                 | <b>LLE</b><br>2 g + 8 mL MeOH. Shake and centrifuge. Dilute 300 µL<br>supernatant with 900 µL MeOH/extraction buffer                                                                                                                                                                                                                                                  | <b>ELISA</b><br>AFB1 MaxSignal® commercial<br>kit                                                                                                                                                   | 2017 | [58] |
| Poultry | Plasma<br>Feces<br>Urine | ZEA, α-ZEL, β-ZEL,<br>Phase II metabolites | n.i.                      | n.i.                      | <b>SPE and (LLE + SEP, combined method)</b><br>plasma or urine sample + Oasis HLB Cartridge +<br>MeOH/H <sub>2</sub> O (5/95, v/v). Evaporate and redissolve in<br>in ACN/H <sub>2</sub> O (15/85, v/v)<br>2 g of homogenized feces samples + 10 mL EtOAc.<br>Shake. Centrifuge. Evaporate (N <sub>2</sub> ) and redissolve in<br>ACN/H <sub>2</sub> O (15/85, v/v) + | <b>LC-MS/MS</b><br>Column: C18 (100 mm x 2.1 mm<br>x 1.7 µm)<br>Flow: 0.3 mL/min<br>MP: (A) H <sub>2</sub> O/0.1% FA; (B)<br>ACN/0.1% FA, in gradient<br>conditions<br>Detector: ESI (-), QTOF, MRM | 2017 | [59] |

## Abbreviations:

|            |                                             |
|------------|---------------------------------------------|
| 15-ADON    | 15-acetyldeoxynivalenol                     |
| 3-ADON     | 3-acetyldeoxynivalenol                      |
| AA         | Acetic acid                                 |
| ABM        | Animal Biomonitoring                        |
| ACN        | Acetonitrile                                |
| AFB1       | Aflatoxin B1                                |
| AFB2       | Aflatoxin B2                                |
| AFBO       | Aflatoxin-8,9-epoxide                       |
| AFG1       | Aflatoxin G1                                |
| AFG2       | Aflatoxin G2                                |
| AFL        | Aflatoxicol                                 |
| AFM1       | Aflatoxin M1                                |
| AFP1       | Aflatoxin P1                                |
| AFQ1       | Aflatoxin Q1                                |
| Afs        | Aflatoxins                                  |
| AME        | Alternariol Monomethyl Ether                |
| AOH        | Alternariol                                 |
| ATX-I      | Altertoxine I                               |
| BEA        | Beauvericin                                 |
| CIT        | Citrinin                                    |
| DAS        | Diacetoxyscirpenol                          |
| DBS        | Dried blood spot                            |
| DH-CIT     | Dihydrocitrinone                            |
| DOM        | Deepoxydeoxynivalenol                       |
| DOM-1      | Deepoxidesoxynivalenol                      |
| DON        | Deoxynivalenol                              |
| DON-15GlcA | DON-15-glucuronide                          |
| DON-3GlcA  | DON-3-glucuronide                           |
| DON-3gluc  | DON-3 glucoside                             |
| DON-s      | DON sulphate                                |
| EFSA       | European Food Safety Authority              |
| ELISA      | Enzyme-Linked ImmunoSorbent Assay           |
| ENNA       | Enniatin A                                  |
| ENNA1      | Enniatin A1                                 |
| ENNB       | Enniatin B                                  |
| ENNB1      | Enniatin B1                                 |
| ERGOT      | Ergot Alkaloids                             |
| ESI        | Electrospray ionization                     |
| EtOAc      | Ethyl acetate                               |
| EU         | European Union                              |
| FA         | Formic acid                                 |
| FB1        | Fumonisin B1                                |
| FB2        | Fumonisin B2                                |
| FB3        | Fumonisin B3                                |
| FB4        | Fumonisin B3                                |
| FBs        | Fumonisin                                   |
| FLD        | Fluorescence Detector                       |
| FUS-X      | Fusarenon-X                                 |
| GlcA       | Glucuronide                                 |
| HBM        | Human Biomonitoring                         |
| HFBx       | Hydrolyzed FBx                              |
| HT-2       | HT-2 toxin                                  |
| IAC        | Immunoaffinity Column                       |
| IARC       | International Agency for Research on Cancer |
| IV         | Intravenous administration                  |

|               |                                                 |
|---------------|-------------------------------------------------|
| LC            | Liquid Chromatography                           |
| LLE           | Liquid-liquid extraction                        |
| LOD           | Limit of detection                              |
| LOQ           | Limit of Quantification                         |
| MeOH          | Methanol                                        |
| MON           | Moniliformin                                    |
| MP            | Mobile phase                                    |
| MRM           | Multiple Reaction Monitoring                    |
| MS            | Mass Spectrometer                               |
| MS/MS         | Tanden Mass Spectrometry                        |
| n.i           | not indicated                                   |
| NEO           | Neosolaniol                                     |
| NIV           | Nivalenol                                       |
| OTA           | Ochratoxin A                                    |
| OT $\alpha$   | Ochratoxin $\alpha$                             |
| OTB           | Ochratoxin B                                    |
| PAT           | Patulin                                         |
| pHFBx         | Partially hydrolyzed FBx                        |
| PO            | Oral administration                             |
| PSA           | Primary Secondary Amines                        |
| Qorbitap      | Quadrupole-orbitrap                             |
| QqQ           | Triple quadrupole;                              |
| QTOF          | Quadrupole-time of flight                       |
| Qtrap         | Quadrupole- ion trap                            |
| QuEChERS      | Quick, easy, cheap, effective, rugged, and safe |
| ROQC          | Roquefortine C                                  |
| SLE           | Solid Liquid Extraction                         |
| SPE           | Solid Phase Extraction                          |
| SRM           | Selective reaction monitoring                   |
| STER          | Sterigmatocystin                                |
| T-2           | T-2 toxin                                       |
| TENT          | Tentoxin                                        |
| ZAL           | Zearalanol                                      |
| ZAN           | Zearalanone                                     |
| ZAN-14-ClcA   | Zearalanone-14-glucuronide                      |
| ZEA           | Zearalenone                                     |
| ZEL-14-ClcA   | Zearalenone-14-glucuronide                      |
| ZEL-16-ClcA   | Zearalenone-16-glucuronide                      |
| $\alpha$ -ZAL | $\alpha$ -zearalanol                            |
| $\alpha$ -ZEL | $\alpha$ -zearalenol                            |
| $\beta$ -ZAL  | $\beta$ -zearalanol                             |
| $\beta$ -ZEL  | $\beta$ -zearalenol                             |

## References

1. Yang, C.-K.; Cheng, Y.-H.; Tsai, W.-T.; Liao, R.-W.; Chang, C.-S.; Chien, W.-C.; Jhang, J.-C.; Yu, Y.-H. Prevalence of Mycotoxins in Feed and Feed Ingredients between 2015 and 2017 in Taiwan. *Environ. Sci. Pollut. Res.* **2019**, *26*, 23798–23806, doi:10.1007/s11356-019-05659-0.
2. Nishimwe, K.; Bowers, E.; Ayabagabo, J. de D.; Habimana, R.; Mutiga, S.; Maier, D. Assessment of Aflatoxin and Fumonisin Contamination and Associated Risk Factors in Feed and Feed Ingredients in Rwanda. *Toxins (Basel)*. **2019**, *11*, 270, doi:10.3390/toxins11050270.
3. Franco, L.T.; Petta, T.; Rottinghaus, G.E.; Bordin, K.; Gomes, G.A.; Oliveira, C.A.F. Co-Occurrence of Mycotoxins in Maize Food and Maize-Based Feed from Small-Scale Farms in Brazil: A Pilot Study. *Mycotoxin Res.* **2019**, *35*, 65–73, doi:10.1007/s12550-018-0331-4.
4. Mokubedi, S.M.; Phoku, J.Z.; Changwa, R.N.; Gbashi, S.; Njobeh, P.B. Analysis of Mycotoxins Contamination in Poultry Feeds Manufactured in Selected Provinces of South Africa Using UHPLC-MS/MS. *Toxins (Basel)*. **2019**, *11*, 452, doi:10.3390/toxins11080452.
5. Juan, C.; Oueslati, S.; Mañes, J.; Berrada, H. Multimycotoxin Determination in Tunisian Farm Animal Feed.

*J. Food Sci.* **2019**, *84*, 3885–3893, doi:10.1111/1750-3841.14948.

6. Abdallah; Girgin; Baydar Mycotoxin Detection in Maize, Commercial Feed, and Raw Dairy Milk Samples from Assiut City, Egypt. *Vet. Sci.* **2019**, *6*, 57, doi:10.3390/vetsci6020057.
7. Arroyo-Manzanares, N.; Rodríguez-Estévez, V.; Arenas-Fernández, P.; García-Campaña, A.M.; Gámiz-Gracia, L. Occurrence of Mycotoxins in Swine Feeding from Spain. *Toxins (Basel)*. **2019**, *11*, 342, doi:10.3390/toxins11060342.
8. Akinmusire, O.O.; El-Yuguda, A.-D.; Musa, J.A.; Oyedele, O.A.; Sulyok, M.; Somorin, Y.M.; Ezekiel, C.N.; Krska, R. Mycotoxins in Poultry Feed and Feed Ingredients in Nigeria. *Mycotoxin Res.* **2019**, *35*, 149–155, doi:10.1007/s12550-018-0337-y.
9. Beyene, A.M.; Du, X.; E. Schrunck, D.; Ensley, S.; Rumbelha, W.K. High-Performance Liquid Chromatography and Enzyme-Linked Immunosorbent Assay Techniques for Detection and Quantification of Aflatoxin B1 in Feed Samples: A Comparative Study. *BMC Res. Notes* **2019**, *12*, 492, doi:10.1186/s13104-019-4538-z.
10. Gao, J.; Wang, J.; Wu, C.; Hou, F.; Chang, S.; Wang, Z.; Pu, Q.; Guo, D.; Fu, H. Fast Screening of Aflatoxins in Dairy Cattle Feeds with CE-LIF Method Combined with Preconcentration Technique of Vortex Assisted Low Density Solvent–Microextraction. *Electrophoresis* **2019**, *40*, 499–507, doi:10.1002/elps.201800339.
11. Jedziniak, P.; Panasiuk, Ł.; Pietruszka, K.; Posyniak, A. Multiple Mycotoxins Analysis in Animal Feed with LC-MS/MS: Comparison of Extract Dilution and Immunoaffinity Clean-up. *J. Sep. Sci.* **2019**, *42*, 1240–1247, doi:10.1002/jssc.201801113.
12. Bani Ismail, Z.; Al-Nabulsi, F.; Abu-Basha, E.; Hananeh, W. Occurrence of On-Farm Risk Factors and Health Effects of Mycotoxins in Dairy Farms in Jordan. *Trop. Anim. Health Prod.* **2020**, *52*, 2371–2377, doi:10.1007/s12550-019-02166-9.
13. Nuwalkaw, K.; Poapolathep, S.; Zhang, Z.; Zhang, Q.; Giorgi, M.; Li, P.; Logrieco, A.F.; Poapolathep, A. Simultaneous Determination of Multiple Mycotoxins in Swine, Poultry and Dairy Feeds Using Ultra High Performance Liquid Chromatography-Tandem Mass Spectrometry. *Toxins (Basel)*. **2020**, *12*, 253, doi:10.3390/toxins12040253.
14. Kemboi, D.C.; Ochieng, P.E.; Antonissen, G.; Croubels, S.; Scippo, M.-L.; Okoth, S.; Kangethe, E.K.; Faas, J.; Doupovec, B.; Lindahl, J.F.; et al. Multi-Mycotoxin Occurrence in Dairy Cattle and Poultry Feeds and Feed Ingredients from Machakos Town, Kenya. *Toxins (Basel)*. **2020**, *12*, 762, doi:10.3390/toxins12120762.
15. Rodríguez-Blanco, M.; Ramos, A.J.; Prim, M.; Sanchis, V.; Marín, S. Usefulness of the Analytical Control of Aflatoxins in Feedstuffs for Dairy Cows for the Prevention of Aflatoxin M1 in Milk. *Mycotoxin Res.* **2020**, *36*, 11–22, doi:10.1007/s12550-019-00362-y.
16. Kumar, A.; Dhanshetty, M.; Banerjee, K. Development and Validation of a Method for Direct Analysis of Aflatoxins in Animal Feeds by Ultra-High-Performance Liquid Chromatography with Fluorescence Detection. *J. AOAC Int.* **2020**, *103*, 940–945, doi:10.1093/jaoacint/qs037.
17. Muñoz-Solano, B.; González-Peñas, E. Mycotoxin Determination in Animal Feed: An LC-FLD Method for Simultaneous Quantification of Aflatoxins, Ochratoxins and Zearalenone in This Matrix. *Toxins (Basel)*. **2020**, *12*, 374, doi:10.3390/toxins12060374.
18. Vaičiulienė, G.; Bakutis, B.; Jovaišienė, J.; Falkauskas, R.; Gerulis, G.; Kerzienė, S.; Baliukonienė, V. Prevalence of Mycotoxins and Endotoxins in Total Mixed Rations and Different Types of Ensiled Forages for Dairy Cows in Lithuania. *Toxins (Basel)*. **2021**, *13*, 890, doi:10.3390/toxins13120890.
19. Patyal, A.; Gill, J.P.S.; Bedi, J.S.; Aulakh, R.S. Assessment of Aflatoxin Contamination in Dairy Animal Concentrate Feed from Punjab, India. *Environ. Sci. Pollut. Res.* **2021**, *28*, 37705–37715, doi:10.1007/s11356-021-13321-x.
20. Awapak, D.; Petchkongkaew, A.; Sulyok, M.; Krska, R. Co-Occurrence and Toxicological Relevance of Secondary Metabolites in Dairy Cow Feed from Thailand. *Food Addit. Contam. Part A* **2021**, *38*, 1013–1027, doi:10.1080/19440049.2021.1905186.
21. Bervis, N.; Lorán, S.; Juan, T.; Carramiñana, J.J.; Herrera, A.; Ariño, A.; Herrera, M. Field Monitoring of Aflatoxins in Feed and Milk of High-Yielding Dairy Cows under Two Feeding Systems. *Toxins (Basel)*. **2021**, *13*, 201, doi:10.3390/toxins13030201.
22. Nasaruddin, N.; Jinap, S.; Samsudin, N.I.P.; Kamarulzaman, N.H.; Sanny, M. Prevalence of Mycotoxigenic Fungi and Assessment of Aflatoxin Contamination: A Multiple Case Study along the Integrated Corn-based Poultry Feed Supply Chain in Malaysia. *J. Sci. Food Agric.* **2021**, *101*, 1812–1821, doi:10.1002/jsfa.10795.
23. Zhao, L.; Zhang, L.; Xu, Z.; Liu, X.; Chen, L.; Dai, J.; Karrow, N.A.; Sun, L. Occurrence of Aflatoxin B1, Deoxynivalenol and Zearalenone in Feeds in China during 2018–2020. *J. Anim. Sci. Biotechnol.* **2021**, *12*, 74, doi:10.1186/s40104-021-00603-0.
24. Changwa, R.; De Boevre, M.; De Saeger, S.; Njobeh, P.B. Feed-Based Multi-Mycotoxin Occurrence in Smallholder Dairy Farming Systems of South Africa: The Case of Limpopo and Free State. *Toxins (Basel)*. **2021**, *13*, 166, doi:10.3390/toxins13020166.
25. Seo, H.; Jang, S.; Jo, H.; Kim, H.; Lee, S.; Yun, H.; Jeong, M.; Moon, J.; Na, T.; Cho, H. Optimization of the

QuEChERS-Based Analytical Method for Investigation of 11 Mycotoxin Residues in Feed Ingredients and Compound Feeds. *Toxins (Basel)*. **2021**, *13*, 767, doi:10.3390/toxins13110767.

26. Naveed, M.; Haleem, K.S.; Ghazanfar, S.; Tauseef, I.; Bano, N.; Adetunji, C.O.; Saleem, M.H.; Alshaya, H.; Paray, B.A. Quantitative Estimation of Aflatoxin Level in Poultry Feed in Selected Poultry Farms. *Biomed Res. Int.* **2022**, *2022*, 1–7, doi:10.1155/2022/5397561.
27. Kassaw, T.S.; Megerssa, Y.C.; Woldemariyam, F.T. Occurrence of Aflatoxins in Poultry Feed in Selected Chicken Rearing Villages of Bishoftu Ethiopia. *Vet. Med. Res. Reports* **2022**, *Volume 13*, 277–286, doi:10.2147/VMRR.S384148.
28. Ferrari, L.; Fumagalli, F.; Rizzi, N.; Grandi, E.; Vailati, S.; Manoni, M.; Ottoboni, M.; Cheli, F.; Pinotti, L. An Eight-Year Survey on Aflatoxin B1 Indicates High Feed Safety in Animal Feed and Forages in Northern Italy. *Toxins (Basel)*. **2022**, *14*, 763, doi:10.3390/toxins14110763.
29. Hao, W.; Li, A.; Wang, J.; An, G.; Guan, S. Mycotoxin Contamination of Feeds and Raw Materials in China in Year 2021. *Front. Vet. Sci.* **2022**, *9*, 1–11, doi:10.3389/fvets.2022.929904.
30. Biscoto, G.L.; Salvato, L.A.; Alvarenga, É.R.; Dias, R.R.S.; Pinheiro, G.R.G.; Rodrigues, M.P.; Pinto, P.N.; Freitas, R.P.; Keller, K.M. Mycotoxins in Cattle Feed and Feed Ingredients in Brazil: A Five-Year Survey. *Toxins (Basel)*. **2022**, *14*, 552, doi:10.3390/toxins14080552.
31. Li, A.; Hao, W.; Guan, S.; Wang, J.; An, G. Mycotoxin Contamination in Feeds and Feed Materials in China in Year 2020. *Front. Vet. Sci.* **2022**, *9*, doi:10.3389/fvets.2022.1016528.
32. Liu, Y.; Jin, Y.; Guo, Q.; Wang, X.; Luo, S.; Yang, W.; Li, J.; Chen, Y. Immunoaffinity Cleanup and Isotope Dilution-Based Liquid Chromatography Tandem Mass Spectrometry for the Determination of Six Major Mycotoxins in Feed and Feedstuff. *Toxins (Basel)*. **2022**, *14*, 631, doi:10.3390/toxins14090631.
33. Mackay, N.; Marley, E.; Leeman, D.; Poplawski, C.; Donnelly, C. Analysis of Aflatoxins, Fumonisin, Deoxynivalenol, Ochratoxin A, Zearalenone, HT-2, and T-2 Toxins in Animal Feed by LC–MS/MS Using Cleanup with a Multi-Antibody Immunoaffinity Column. *J. AOAC Int.* **2022**, *105*, 1330–1340, doi:10.1093/jaoacint/qsac035.
34. Wang, Y.; Wang, X.; Wang, S.; Fotina, H.; Wang, Z. A Novel Lateral Flow Immunochromatographic Assay for Rapid and Simultaneous Detection of Aflatoxin B1 and Zearalenone in Food and Feed Samples Based on Highly Sensitive and Specific Monoclonal Antibodies. *Toxins (Basel)*. **2022**, *14*, 615, doi:10.3390/toxins14090615.
35. Muñoz-Solano, B.; González-Peñas, E. Co-Occurrence of Mycotoxins in Feed for Cattle, Pigs, Poultry, and Sheep in Navarra, a Region of Northern Spain. *Toxins (Basel)*. **2023**, *15*, 172, doi:10.3390/toxins15030172.
36. Hao, W.; Guan, S.; Li, A.; Wang, J.; An, G.; Hofstetter, U.; Schatzmayr, G. Mycotoxin Occurrence in Feeds and Raw Materials in China: A Five-Year Investigation. *Toxins (Basel)*. **2023**, *15*, 63, doi:10.3390/toxins15010063.
37. Prasad, S.; Streit, B.; Gruber, C.; Gonaus, C. Enzymatic Degradation of Ochratoxin A in the Gastrointestinal Tract of Piglets. *J. Anim. Sci.* **2023**, *101*, 1–11, doi:10.1093/jas/skad171.
38. Muñoz-Solano, B.; González-Peñas, E. Biomonitoring of 19 Mycotoxins in Plasma from Food-Producing Animals (Cattle, Poultry, Pigs, and Sheep). *Toxins (Basel)*. **2023**, *15*, 295, doi:10.3390/toxins15040295.
39. De Baere, S.; Ochieng, P.E.; Kemboi, D.C.; Scippo, M.-L.; Okoth, S.; Lindahl, J.F.; Gathumbi, J.K.; Antonissen, G.; Croubels, S. Development of High-Throughput Sample Preparation Procedures for the Quantitative Determination of Aflatoxins in Biological Matrices of Chickens and Cattle Using UHPLC-MS/MS. *Toxins (Basel)*. **2023**, *15*, 37, doi:10.3390/toxins15010037.
40. Panisson, J.C.; Wellington, M.O.; Bosompem, M.A.; Nagl, V.; Schwartz-Zimmermann, H.E.; Columbus, D.A. Urinary and Serum Concentration of Deoxynivalenol (DON) and DON Metabolites as an Indicator of DON Contamination in Swine Diets. *Toxins (Basel)*. **2023**, *15*, 120, doi:10.3390/toxins15020120.
41. Streit, B.; Czabany, T.; Weingart, G.; Marchetti-Deschmann, M.; Prasad, S. Toolbox for the Extraction and Quantification of Ochratoxin A and Ochratoxin Alpha Applicable for Different Pig and Poultry Matrices. *Toxins (Basel)*. **2022**, *14*, 432, doi:10.3390/toxins14070432.
42. Zhang, S.; Zhou, S.; Yu, S.; Zhao, Y.; Wu, Y.; Wu, A. LC-MS/MS Analysis of Fumonisin B1, B2, B3, and Their Hydrolyzed Metabolites in Broiler Chicken Feed and Excreta. *Toxins (Basel)*. **2022**, *14*, 131, doi:10.3390/toxins14020131.
43. Tkaczyk, A.; Jedziniak, P. Development of a Multi-Mycotoxin LC-MS/MS Method for the Determination of Biomarkers in Pig Urine. *Mycotoxin Res.* **2021**, *37*, 169–181, doi:10.1007/s12550-021-00428-w.
44. Tkaczyk, A.; Jedziniak, P.; Zielonka, L.; Dąbrowski, M.; Ochodzki, P.; Rudawska, A. Biomarkers of Deoxynivalenol, Citrinin, Ochratoxin A and Zearalenone in Pigs after Exposure to Naturally Contaminated Feed Close to Guidance Values. *Toxins (Basel)*. **2021**, *13*, 750, doi:10.3390/toxins13110750.
45. Meerpoel, C.; Vidal, A.; Tangni, E.K.; Huybrechts, B.; Couck, L.; De Rycke, R.; De Bels, L.; De Saeger, S.; Van den Broeck, W.; Devreese, M.; et al. A Study of Carry-Over and Histopathological Effects after Chronic Dietary Intake of Citrinin in Pigs, Broiler Chickens and Laying Hens. *Toxins (Basel)*. **2020**, *12*, 719, doi:10.3390/toxins12110719.



46. Meerpoel, C.; Vidal, A.; Huybrechts, B.; Tangni, E.K.; De Saeger, S.; Croubels, S.; Devreese, M. Comprehensive Toxicokinetic Analysis Reveals Major Interspecies Differences in Absorption, Distribution and Elimination of Citrinin in Pigs and Broiler Chickens. *Food Chem. Toxicol.* **2020**, *141*, 111365, doi:10.1016/j.fct.2020.111365.
47. Antonissen, G.; De Baere, S.; Novak, B.; Schatzmayr, D.; den Hollander, D.; Devreese, M.; Croubels, S. Toxicokinetics of Hydrolyzed Fumonisin B1 after Single Oral or Intravenous Bolus to Broiler Chickens Fed a Control or a Fumonisin-Contaminated Diet. *Toxins (Basel)*. **2020**, *12*, 413, doi:10.3390/toxins12060413.
48. Lauwers, M.; De Baere, S.; Letor, B.; Rychlik, M.; Croubels, S.; Devreese, M. Multi LC-MS/MS and LC-HRMS Methods for Determination of 24 Mycotoxins Including Major Phase I and II Biomarker Metabolites in Biological Matrices from Pigs and Broiler Chickens. *Toxins (Basel)*. **2019**, *11*, 171, doi:10.3390/toxins11030171.
49. Lauwers, M.; Croubels, S.; Letor, B.; Gougoulis, C.; Devreese, M. Biomarkers for Exposure as A Tool for Efficacy Testing of A Mycotoxin Detoxifier in Broiler Chickens and Pigs. *Toxins (Basel)*. **2019**, *11*, 187, doi:10.3390/toxins11040187.
50. Lauwers, M.; Croubels, S.; De Baere, S.; Sevastyanova, M.; Romera Sierra, E.M.; Letor, B.; Gougoulis, C.; Devreese, M. Assessment of Dried Blood Spots for Multi-Mycotoxin Biomarker Analysis in Pigs and Broiler Chickens. *Toxins (Basel)*. **2019**, *11*, 541, doi:10.3390/toxins11090541.
51. Catteuw, A.; Broekaert, N.; De Baere, S.; Lauwers, M.; Gasthuys, E.; Huybrechts, B.; Callebaut, A.; Ivanova, L.; Uhlig, S.; De Boevre, M.; et al. Insights into In Vivo Absolute Oral Bioavailability, Biotransformation, and Toxicokinetics of Zearalenone,  $\alpha$ -Zearalenol,  $\beta$ -Zearalenol, Zearalenone-14-Glucoside, and Zearalenone-14-Sulfate in Pigs. *J. Agric. Food Chem.* **2019**, *67*, 3448–3458, doi:10.1021/acs.jafc.8b05838.
52. Gambacorta, L.; Olsen, M.; Solfrizzo, M. Pig Urinary Concentration of Mycotoxins and Metabolites Reflects Regional Differences, Mycotoxin Intake and Feed Contaminations. *Toxins (Basel)*. **2019**, *11*, 378, doi:10.3390/toxins11070378.
53. Jurišić, N.; Schwartz-Zimmermann, H.E.; Kunz-Vekiru, E.; Moll, W.D.; Schweiger, W.; Fowler, J.; Berthiller, F. Determination of Aflatoxin Biomarkers in Excreta and Ileal Content of Chickens. *Poult. Sci.* **2019**, *98*, 5551–5561, doi:10.3382/ps/pez308.
54. Yan, Z.; Wang, L.; Wang, J.; Tan, Y.; Yu, D.; Chang, X.; Fan, Y.; Zhao, D.; Wang, C.; De Boevre, M.; et al. A QuEChERS-Based Liquid Chromatography-Tandem Mass Spectrometry Method for the Simultaneous Determination of Nine Zearalenone-Like Mycotoxins in Pigs. *Toxins (Basel)*. **2018**, *10*, 129, doi:10.3390/toxins10030129.
55. Phruksawan, W.; Poapolathep, S.; Giorgi, M.; Imsilp, K.; Sakulthaew, C.; Owen, H.; Poapolathep, A. Toxicokinetic Profile of Fusarenon-X and Its Metabolite Nivalenol in the Goat (*Capra Hircus*). *Toxicon* **2018**, *153*, 78–84, doi:10.1016/j.toxicon.2018.08.015.
56. Schertz, H.; Kluess, J.; Frahm, J.; Schatzmayr, D.; Dohnal, I.; Bichl, G.; Schwartz-Zimmermann, H.; Breves, G.; Dänicke, S. Oral and Intravenous Fumonisin Exposure in Pigs—A Single-Dose Treatment Experiment Evaluating Toxicokinetics and Detoxification. *Toxins (Basel)*. **2018**, *10*, 150, doi:10.3390/toxins10040150.
57. De Baere, S.; Croubels, S.; Novak, B.; Bichl, G.; Antonissen, G. Development and Validation of a UPLC-MS/MS and UPLC-HR-MS Method for the Determination of Fumonisin B1 and Its Hydrolysed Metabolites and Fumonisin B2 in Broiler Chicken Plasma. *Toxins (Basel)*. **2018**, *10*, 62, doi:10.3390/toxins10020062.
58. Sineque, A.; Macuamule, C.; Dos Anjos, F. Aflatoxin B1 Contamination in Chicken Livers and Gizzards from Industrial and Small Abattoirs, Measured by ELISA Technique in Maputo, Mozambique. *Int. J. Environ. Res. Public Health* **2017**, *14*, 951, doi:10.3390/ijerph14090951.
59. Yang, S.; Zhang, H.; Sun, F.; De Ruyck, K.; Zhang, J.; Jin, Y.; Li, Y.; Wang, Z.; Zhang, S.; De Saeger, S.; et al. Metabolic Profile of Zearalenone in Liver Microsomes from Different Species and Its in Vivo Metabolism in Rats and Chickens Using Ultra High-Pressure Liquid Chromatography-Quadrupole/Time-of-Flight Mass Spectrometry. *J. Agric. Food Chem.* **2017**, *65*, 11292–11303, doi:10.1021/acs.jafc.7b04663.
